# Supplementary material
Source: publisher figshare collection journal article supplement (https://acs.figshare.com/ndownloader/files/13824125)
Supplement: Supplementary file 1 [file 13824125]

# **Columnar Iridium(III) Metallomesogens Based on Polycatenar Pyridyltetrazolate with Ambipolar Carrier Mobility Behavior**

*Guo Zou, Li Zhao, Longwei Zeng, Kaijun Luo, \* Hailiang Ni, Haifeng Wang, Quan  
Li, \* Wenhao Yu and Xuelian Li.*

College of Chemistry and Materials Science, Sichuan Normal University, 5 Jingan  
Road, Chengdu 610068 China. E-mail: [luo-k-j007@163.com](mailto:luo-k-j007@163.com)

## **Table of contents:**

|                                                                                 |    |
|---------------------------------------------------------------------------------|----|
| 1. Synthetic Procedures and Characterization.....                               | 2  |
| 2. <sup>1</sup> H NMR and <sup>13</sup> C NMR spectra of all complexes.....     | 12 |
| 3. The crystallographic data, selected bond lengths and angles of Ir-A3.....    | 19 |
| 4. Photophysical data of iridium(III) complexes.....                            | 20 |
| 5. Cyclic voltammetry (CV) of complex Ir-B3.....                                | 22 |
| 6. Polarized optical micrographs of Ir-C1.....                                  | 22 |
| 7. DSC curves of iridium(III) complexes.....                                    | 23 |
| 8. Computed excitation energies and oscillator strengths for complex Ir-A3..... | 27 |
| 9. DSC data of all complexes.....                                               | 28 |

## 1. Synthetic Procedures and Characterization

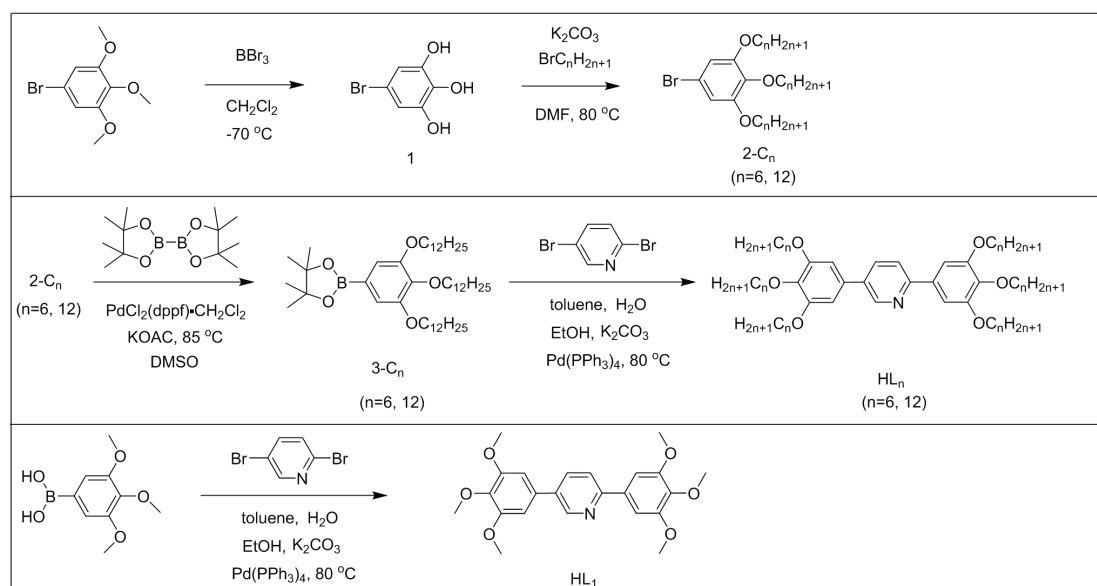

**Scheme S1.** Synthetic route for cyclometalated ligands.

### 1-Bromo-3,4,5-trihydroxybenzene (1)

To a stirred solution of 1-bromo-3,4,5-trimethoxybenzene (3.00 g, 12.10 mmol) in dry  $\text{CH}_2\text{Cl}_2$  (25.00 mL) was added dropwise  $\text{BBr}_3$  (10.02 g, 40.08 mmol) at  $-70\text{ }^\circ\text{C}$ . The mixture was allowed to warm up to room temperature (RT) and stirred overnight. The reaction mixture was then added dropwise a large amount of ice-water, and then extracted with ethyl acetate. The combined organic layers were washed with water three times, and dried over anhydrous  $\text{MgSO}_4$ . After filtration and evaporation, the product was recrystallized from ethyl acetate/hexane, and dried under vacuum to afford **1** as an off-white solid (yield = 2.40 g, 97%). This product was used in the next reaction directly without further purification.

### 1-Bromo-3,4,5-tridodecyloxybenzene (2-C<sub>12</sub>)

A mixture of **1** (2.00 g, 9.80 mmol), 1-bromododecane (8.02 g, 32.20 mmol), and  $\text{K}_2\text{CO}_3$  (8.11 g, 58.80 mmol) in dry *N,N*-Dimethylformamide (DMF, 50.00 mL) was vigorously stirred for 36 h at  $80\text{ }^\circ\text{C}$ . After cooling to RT, the reaction mixture was poured into a large amount of water, and then extracted with  $\text{CH}_2\text{Cl}_2$ . The combined organic layers were washed with water, and dried over anhydrous  $\text{MgSO}_4$ . After filtration and evaporation, the product was purified by silica gel column chromatography (petroleum ether (PE)/ethyl acetate = 10:1, v/v), and dried under vacuum to give 2-C<sub>12</sub> as a white solid (yield = 6.78 g, 98%).  $^1\text{H}$  NMR (400MHz,  $\text{CDCl}_3$ ):  $\delta$  6.67 (s, 2H), 3.97 – 3.87 (m, 6H), 1.83 – 1.68 (m, 6H), 1.45 (d,  $J$  = 6.0 Hz, 6H), 1.28 (d,  $J$  = 14.7 Hz, 48H), 0.88 (t,  $J$  = 6.8 Hz, 9H).

### 5-bromo-1,2,3-tris(hexyloxy)benzene (2-C<sub>6</sub>)

It was synthesised according to the preparation procedure of 2-C<sub>12</sub>. A colorless oil of 2-C<sub>6</sub> was obtained in 89% yield.  $^1\text{H}$  NMR (400 MHz,  $\text{CDCl}_3$ )  $\delta$  6.67 (s, 2H), 3.92 (t,

$J = 6.5$  Hz, 6H), 1.83 – 1.69 (m, 6H), 1.52 – 1.44 (m, 6H), 1.36 – 1.30 (m, 12H), 0.90 (t,  $J = 7.0$  Hz, 9H).

#### **4,4,5,5-tetramethyl-2-(3,4,5-tris(dodecyloxy)phenyl)-1,3,2-dioxaborolane (3-C<sub>12</sub>)**

A mixture of 2-C<sub>12</sub> (2.00 g, 2.82 mmol), bis(pinacolato)diboron (0.79 g, 3.10 mmol), potassium acetate (0.83 g, 8.47 mmol), [1,1'-bis(diphenylphosphino)-ferrocene]dichloropalladium complex with dichloromethane (1:1) (0.087 g, 0.11 mmol), and dimethyl sulfoxide (DMSO, 60 mL) was stirred at 85 °C for 24 h under nitrogen atmosphere. The resulting mixture was cooled to RT, poured into ice-water (150 mL) and then extracted with CH<sub>2</sub>Cl<sub>2</sub> (3 × 50 mL). The combined organic layers were washed with water and dried over anhydrous MgSO<sub>4</sub> and filtrated. The filtrate was evaporated to remove the solvent and the residue was passed through a flash silica gel column using PE / ethyl acetate (6:1) as the eluent to give 3-C<sub>12</sub> as a gray waxy solid (yield = 1.50 g, 70 %). <sup>1</sup>H NMR (400 MHz, CDCl<sub>3</sub>)  $\delta$  6.99 (s, 2H), 4.03 – 3.95 (m, 6H), 1.84 – 1.69 (m, 6H), 1.45 (dd,  $J = 14.7$ , 7.2 Hz, 6H), 1.33 (s, 12H), 1.26 (s, 48H), 0.88 (t,  $J = 6.8$  Hz, 9H).

#### **4,4,5,5-tetramethyl-2-(3,4,5-tris(hexyloxy)phenyl)-1,3,2-dioxaborolane (3-C<sub>6</sub>)**

It was synthesised according to the preparation procedure of 3-C<sub>12</sub>. A colorless oil of 3-C<sub>6</sub> was obtained in 62% yield. <sup>1</sup>H NMR (400 MHz, CDCl<sub>3</sub>)  $\delta$  7.01 (s, 2H), 4.01 (dt,  $J = 13.1$ , 6.6 Hz, 6H), 1.85 – 1.70 (m, 6H), 1.53 – 1.44 (m, 6H), 1.38 – 1.30 (m, 24H), 0.91 (t,  $J = 1.7$  Hz, 9H).

#### **2,5-bis(3,4,5-tris(dodecyloxy)phenyl)pyridine (HL<sub>12</sub>)**

To a mixture of 3-C<sub>12</sub> (3.00 g, 3.96 mmol), 2,5-dibromopyridine (0.47 g, 1.98 mmol), potassium carbonate (1.1 g, 7.97 mmol) and tetrakis(triphenylphosphine) palladium (0.23 g, 0.20 mmol) was added a degassed mixture of toluene (30 mL), ethanol (15 mL) and water (15 mL). The mixture was refluxed for 24 h under the protection of nitrogen. After cooled to RT, the mixture was poured into water (200 mL) and extracted with CH<sub>2</sub>Cl<sub>2</sub> (3 × 50 mL). The combined organic layer was dried over anhydrous MgSO<sub>4</sub> and filtered. The filtrate was evaporated to remove the solvent and the residue was passed through a flash silica gel column using PE / CH<sub>2</sub>Cl<sub>2</sub> (2:1) as the eluent to give a white solid (1.32 g, 50 %). <sup>1</sup>H NMR (400 MHz, CDCl<sub>3</sub>)  $\delta$  8.85 (d,  $J = 2.2$  Hz, 1H), 7.86 (dd,  $J = 8.3$ , 2.3 Hz, 1H), 7.70 (d,  $J = 8.3$  Hz, 1H), 7.25 (s, 2H), 6.77 (s, 2H), 4.12 – 3.98 (m, 12H), 1.80 (ddd,  $J = 20.6$ , 12.9, 6.5 Hz, 12H), 1.48 (dd,  $J = 13.7$ , 6.5 Hz, 12H), 1.29 (d,  $J = 21.4$  Hz, 96H), 0.88 (dd,  $J = 7.3$ , 6.2 Hz, 18H).

#### **2,5-bis(3,4,5-tris(hexyloxy)phenyl)pyridine (HL<sub>6</sub>)**

It was synthesised according to the preparation procedure of HL<sub>12</sub>. A white waxy solid of HL<sub>6</sub> was obtained in 68% yield. <sup>1</sup>H NMR (400 MHz, CDCl<sub>3</sub>)  $\delta$  8.85 (d,  $J = 2.0$  Hz, 1H), 7.86 (dd,  $J = 8.3$ , 2.3 Hz, 1H), 7.70 (d,  $J = 8.3$  Hz, 1H), 7.25 (s, 2H), 6.78 (s, 2H), 4.13 – 3.98 (m, 12H), 1.89 – 1.73 (m, 12H), 1.55 – 1.44 (m, 12H), 1.41 – 1.23 (m, 24H), 0.91 (t,  $J = 7.0$  Hz, 18H).

#### **2,5-bis(3,4,5-trimethoxyphenyl)pyridine (HL<sub>1</sub>)**

To a mixture of (3,4,5-trimethoxyphenyl)boronic acid (3.00 g, 14.15 mmol), 2,5-dibromopyridine (1.67 g, 7.00 mmol), potassium carbonate (5.86 g, 42.45 mmol) and tetrakis(triphenylphosphine) palladium (0.82 g, 0.71 mmol) was added a degassed mixture of toluene (30 mL), ethanol (15 mL) and water (15 mL). The mixture was

refluxed for 24 h under the protection of nitrogen. After cooled to RT, the mixture was poured into water (200 mL) and extracted with CH<sub>2</sub>Cl<sub>2</sub> (3 × 50 mL). The combined organic layer was dried over anhydrous MgSO<sub>4</sub> and filtered. The filtrate was evaporated to remove the solvent and the residue was passed through a flash silica gel column using PE/CH<sub>2</sub>Cl<sub>2</sub>/ethyl acetate (2:1:1) as the eluent to give a white powder (1.97 g, 68%). <sup>1</sup>H NMR (400 MHz, CDCl<sub>3</sub>) δ 8.87 (d, J = 1.9 Hz, 1H), 7.89 (dd, J = 8.3, 2.3 Hz, 1H), 7.75 (d, J = 8.3 Hz, 1H), 7.28 (s, 2H), 6.79 (s, 2H), 3.97 (s, 6H), 3.93 (s, 6H), 3.90 (d, J = 2.6 Hz, 6H).

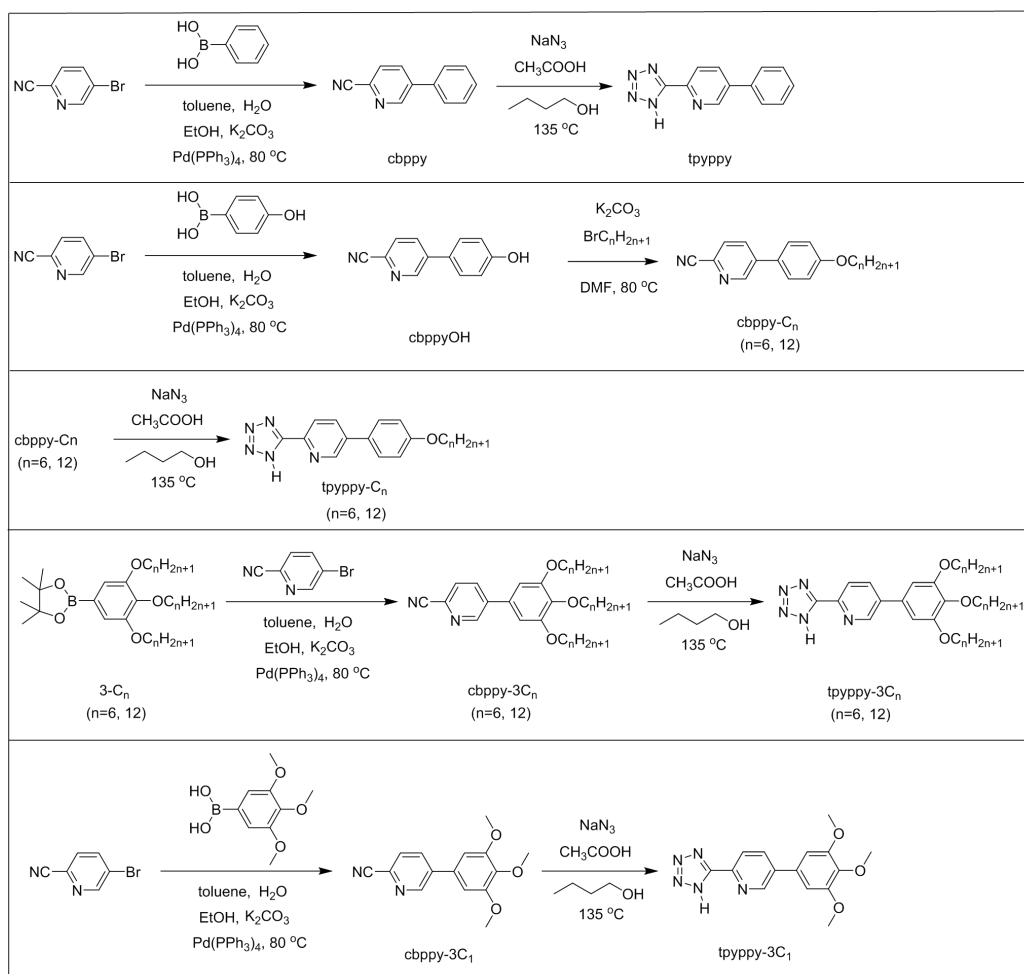

**Scheme S2.** Synthetic route for ancillary ligands.

### cbppy

To a mixture of 5-bromopicolonitrile (1.00 g, 5.46 mmol), phenylboronic acid (0.80 g, 6.55 mmol), potassium carbonate (2.26 g, 16.38 mmol) and tetrakis(triphenylphosphine) palladium (500 mg) was added a degassed mixture of tetrahydrofuran (THF, 40 mL) and water (20 mL). The mixture was refluxed for 18 h under the protection of argon. After cooled to RT, the mixture was poured into water (200 mL) and extracted with CH<sub>2</sub>Cl<sub>2</sub> (3 × 50 mL). The combined organic layer was dried over anhydrous MgSO<sub>4</sub> and filtered. The filtrate was evaporated to remove the solvent and the residue was passed through a flash silica gel column using PE / ethyl acetate (2:1) as the eluent to give a white solid (0.85 g, 87%). <sup>1</sup>H NMR (400 MHz, CDCl<sub>3</sub>) δ: 8.97 - 8.91 (m, 1H), 8.01 (dd, J = 8.1, 2.2 Hz, 1H), 7.78 (d, J = 8.1 Hz, 1H),

7.60 (d,  $J = 7.9$  Hz, 2H), 7.56 – 7.45 (m, 3H).

#### **tpyppy**

cbppy(0.50 g, 2.78 mmol),  $\text{NaN}_3$ (0.54 g, 8.34mmol), acetic acid (0.53 g, 8.83 mmol) and n-butyl alcohol (30 mL) were added into a 100 mL round-bottom flask. The mixture was refluxed for 4 days under the protection of argon. After cooled to RT, adjusting its pH to 2-3, the suspension was filtered, and washed with  $\text{CH}_2\text{Cl}_2$  (3×5mL) and water (3×5mL). Then a white solid of tpyppy was obtained (0.49 g, 80%). The product was used directly to the next step of no further purification.  $^1\text{H}$  NMR (400 MHz,  $\text{DMSO-d}_6$ )  $\delta$ : 9.06 (s, 1H), 8.32 (d,  $J = 8.2$  Hz, 1H), 8.24 (d,  $J = 8.2$  Hz, 1H), 7.80 (d,  $J = 7.4$  Hz, 2H), 7.53-7.46 (m, 2H), 7.43 (t,  $J = 7.3$  Hz, 1H).

#### **cbppyOH**

To a mixture of 5-bromopicolonitrile (1.00 g, 5.46 mmol), 4-Hydroxyphenylboronic acid(0.90 g, 6.55mmol), potassium carbonate (2.00 g 14.49 mmol) and tetrakis(triphenylphosphine) palladium (500 mg) was added a degassed mixture of THF (40 mL) and water (20mL). The mixture was refluxed for 18 h under the protection of argon. After cooled to RT, the mixture was poured into water (200 mL) and extracted with  $\text{CH}_2\text{Cl}_2$  (3 × 50mL). The combined organic layer was dried over anhydrous  $\text{MgSO}_4$  and filtered. The filtrate was evaporated to remove the solvent and the residue was passed through a flash silica gel column using PE / ethyl acetate (1:1) as the eluent to give a white solid (0.92 g, 86%).  $^1\text{H}$  NMR (400 MHz,  $\text{CDCl}_3$ )  $\delta$ : 8.90 (d,  $J = 1.5$  Hz, 1H), 7.95 (dd,  $J = 8.1, 2.3$  Hz, 1H), 7.74 (d,  $J = 8.1$  Hz, 1H), 7.51 (d,  $J = 8.6$  Hz, 2H), 6.99 (d,  $J = 8.6$  Hz, 2H).

#### **cbppy-C<sub>6</sub>**

cbppyOH (0.50g, 2.55 mmol) was added to a solution of 1-bromohexane (0.51g, 3.09mmol) and  $\text{K}_2\text{CO}_3$  (1.06 g, 7.68mmol) in DMF (50 mL), and was stirred vigorously for 24 h at 80 °C under a argon atmosphere. The mixture was cooled to RT and filtrated. The filtrate was evaporated to remove the solvent and then poured into 100 mL of water and was extracted with  $\text{CH}_2\text{Cl}_2$  (3 × 50 mL). The mixed organic layer was washed with water and brine, dried over  $\text{MgSO}_4$  and filtered. The filtrate was evaporated and the residue was purified by dry a flash silica gel column using PE / ethyl acetate (7:1) as eluent to gain cbppy-C<sub>6</sub> as a white solid (0.57 g, 80%).  $^1\text{H}$  NMR (400 MHz,  $\text{CDCl}_3$ )  $\delta$ : 8.91 (d,  $J = 1.7$  Hz, 1H), 7.96 (dd,  $J = 8.1, 2.3$  Hz, 1H), 7.73 (d,  $J = 8.1$  Hz, 1H), 7.54 (dd,  $J = 9.3, 2.4$  Hz, 2H), 7.02 (t,  $J = 5.9$  Hz, 2H), 4.01 (t,  $J = 6.6$  Hz, 2H), 1.86 - 1.74 (m, 2H), 1.53 - 1.29 (m, 6H), 0.91 (t,  $J = 7.0$  Hz, 3H).

#### **tpyppy-C<sub>6</sub>**

It was synthesised according to the preparation procedure of tpyppy. A white solid of tpyppy-C<sub>6</sub> was obtained in 68% yield.  $^1\text{H}$  NMR (400 MHz,  $\text{DMSO-d}_6$ )  $\delta$ : 8.76 (s, 1H), 7.99 (s, 2H), 7.61 (d,  $J = 7.8$  Hz, 2H), 7.00 (d,  $J = 7.9$  Hz, 2H), 3.96 (t,  $J = 6.5$  Hz, 2H), 1.74-1.63 (m, 2H), 1.32-1.25 (m, 6H), 0.83 (t,  $J = 6.6$  Hz, 3H).

#### **cbppy-C<sub>12</sub>**

It was synthesised according to the preparation procedure of cbppy-C<sub>6</sub>. A white solid of cbppy-C<sub>12</sub> was obtained in 88% yield.  $^1\text{H}$  NMR (400 MHz,  $\text{CDCl}_3$ )  $\delta$ : 8.92 (s, 1H), 7.96 (dd,  $J = 8.1, 1.8$  Hz, 1H), 7.73 (t,  $J = 8.4$  Hz, 1H), 7.54 (t,  $J = 7.1$  Hz, 2H),

7.02 (t,  $J = 8.7$  Hz, 2H), 4.00 (d,  $J = 6.6$  Hz, 2H), 1.87 – 1.75 (m, 2H), 1.52 - 1.19 (m, 18H), 0.88 (t,  $J = 6.7$  Hz, 3H).

#### **tpyppy- $C_{12}$**

It was synthesised according to the preparation procedure of tpyppy. A white solid of tpyppy- $C_{12}$  was obtained in 62% yield.  $^1H$  NMR (400 MHz, DMSO- $d_6$ )  $\delta$ : 8.76 (s, 1H), 7.98 (s, 2H), 7.62 (d,  $J = 8.6$  Hz, 2H), 6.99 (d,  $J = 8.6$  Hz, 2H), 3.95 (t,  $J = 6.4$  Hz, 2H), 1.65 (m, 2H), 1.36-1.18 (m, 17H), 0.88 (t,  $J = 6.6$  Hz, 3H).

#### **cbppy- $3C_6$**

To a mixture of 5-bromopicolinonitrile (1.00 g, 5.46 mmol), 3- $C_6$  (3.04 g, 6.02 mmol), potassium carbonate (2.26 g, 16.38 mmol) and tetrakis(triphenylphosphine) palladium (500 mg) was added a degassed mixture of toluene (20 mL), water (10 mL) and ethanol (10 mL). The mixture was refluxed for 18 h under the protection of argon. After cooled to RT, the mixture was poured into water (200 mL) and extracted with  $CH_2Cl_2$  ( $3 \times 50$  mL). The combined organic layer was dried over anhydrous  $MgSO_4$  and filtered. The filtrate was evaporated to remove the solvent and the residue was passed through a flash silica gel column using PE / ethyl acetate (10:1) as the eluent to give a white solid (1.39 g, 53%).  $^1H$  NMR (400 MHz,  $CDCl_3$ )  $\delta$ : 8.89 (s, 1H), 7.94 (dd,  $J = 8.1, 1.6$  Hz, 1H), 7.73 (d,  $J = 8.1$  Hz, 1H), 6.73 (s, 2H), 4.09 – 3.96 (m, 6H), 1.79 (ddd,  $J = 27.1, 14.5, 6.9$  Hz, 6H), 1.47 (dd,  $J = 14.4, 7.3$  Hz, 6H), 1.29 (d,  $J = 22.0$  Hz, 12H), 0.88 (t,  $J = 6.6$  Hz, 9H).

#### **tpyppy- $3C_6$**

It was synthesised according to the preparation procedure of tpyppy. A white solid of tpyppy- $3C_6$  was obtained in 50% yield.  $^1H$  NMR (400 MHz, DMSO- $d_6$ )  $\delta$ : 8.73 (s, 1H), 7.95 (s, 2H), 7.58 (d,  $J = 7.8$  Hz, 2H), 3.91 (t,  $J = 6.5$  Hz, 6H), 1.82 – 1.71 (m, 6H), 1.53 – 1.42 (m, 6H), 1.35 – 1.31 (m, 12H), 0.90 (t,  $J = 7.0$  Hz, 9H).

#### **cbppy- $3C_{12}$**

It was synthesised according to the preparation procedure of cbppy- $3C_6$ . A white solid of cbppy- $3C_{12}$  was obtained in 58% yield.  $^1H$  NMR (400 MHz,  $CDCl_3$ )  $\delta$ : 8.92 – 8.85 (m, 1H), 7.97 – 7.91 (m, 1H), 7.75 – 7.70 (m, 1H), 6.73 (s, 2H), 4.07 – 3.96 (m, 6H), 1.88 – 1.72 (m, 6H), 1.54 – 1.44 (m, 6H), 1.37 – 1.22 (m, 48H), 0.88 (t,  $J = 5.2$  Hz, 9H).

#### **tpyppy- $3C_{12}$**

It was synthesised according to the preparation procedure of tpyppy. A white solid of tpyppy- $3C_{12}$  was obtained in 60% yield.  $^1H$  NMR (400 MHz, DMSO- $d_6$ )  $\delta$ : 8.75 (s, 1H), 7.99 (s, 2H), 7.57 (d,  $J = 7.8$  Hz, 2H), 4.04 – 3.95 (m, 6H), 1.86 – 1.73 (m, 6H), 1.52 – 1.47 (m, 6H), 1.35 – 1.22 (m, 48H), 0.89 (t,  $J = 5.2$  Hz, 9H).

#### **cbppy- $3C_1$**

To a mixture of 5-bromopicolinonitrile (1.00 g, 5.46 mmol), (3,4,5-trimethoxyphenyl)boronic acid (1.16 g, 5.47 mmol), potassium carbonate (2.26 g, 16.38 mmol) and tetrakis(triphenylphosphine) palladium (0.32 mg) was added a degassed mixture of toluene (20 mL), water (10 mL) and ethanol (10 mL). The mixture was refluxed for 18 h under the protection of argon. After cooled to RT, the mixture was poured into water (200 mL) and extracted with  $CH_2Cl_2$  ( $3 \times 50$  mL). The combined organic layer was dried over anhydrous  $MgSO_4$  and filtered. The filtrate was

evaporated to remove the solvent and the residue was passed through a flash silica gel column using PE / ethyl acetate (10:1) as the eluent to give a white solid.  $^1\text{H}$  NMR (400 MHz,  $\text{CDCl}_3$ )  $\delta$  8.91 (d,  $J$  = 1.5 Hz, 1H), 7.97 (dd,  $J$  = 8.1, 2.2 Hz, 1H), 7.76 (d,  $J$  = 8.1 Hz, 1H), 6.76 (s, 2H), 3.94 (s, 6H), 3.91 (s, 3H).

### tpyppy-3C<sub>1</sub>

It was synthesised according to the preparation procedure of tpyppy. A white solid of tpyppy-3C<sub>1</sub> was obtained in 82% yield.  $^1\text{H}$  NMR (400 MHz,  $\text{DMSO-d}_6$ )  $\delta$  9.15 (s, 1H), 8.42 (d,  $J$  = 8.1 Hz, 1H), 8.30 (d,  $J$  = 8.2 Hz, 1H), 7.12 (s, 2H), 3.91 (s, 6H), 3.73 (s, 3H).

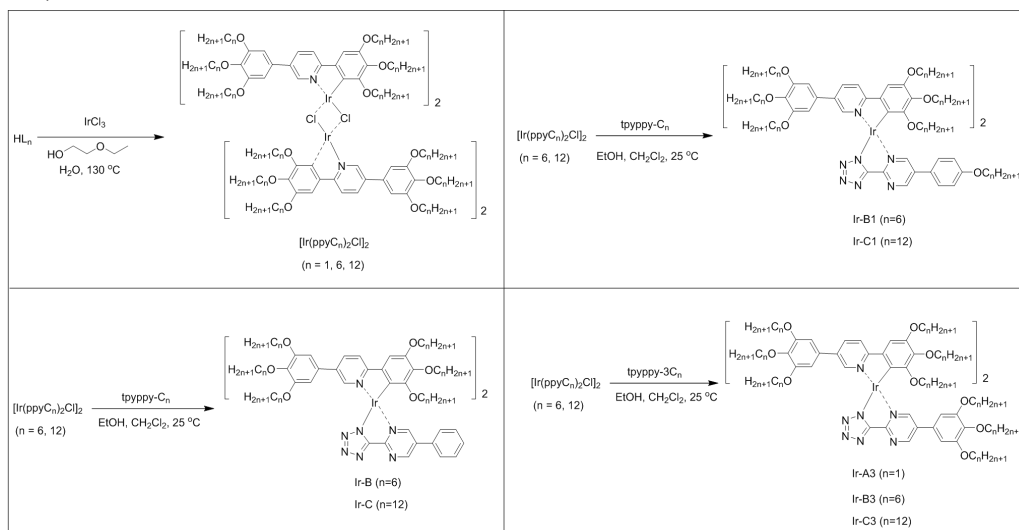

**Scheme S3.** Synthetic route for iridium(III) complexes.

### Ir-A3

To a mixture of  $\text{IrCl}_3$  (0.25 g, 0.85 mmol) and water (2.50 mL) was added a solution of  $\text{HL}_1$  (0.70 g, 1.70 mmol) and 2-ethoxyethanol (10.00 mL). The mixture was stirred under inert gas atmosphere at 130 °C for 24 h. After cooled to RT, the colored precipitate was filtered off and was washed with water (10 mL) and ethanol (10 mL) to gain  $[\text{Ir}(\text{ppyC}_1)_2\text{Cl}]_2$  dimmers as a red solid (0.60 g, 0.29 mmol) directly used in the following process. A mixture of  $[\text{Ir}(\text{ppyC}_1)_2\text{Cl}]_2$  (0.60 g, 0.29 mmol), and tpyppy-3C<sub>1</sub> (0.27 g, 0.86 mmol) were stirred in  $\text{CH}_2\text{Cl}_2$  (10 mL) and ethanol (3 mL) under argon atmosphere at RT of overnight. The mixture was extracted with  $\text{CH}_2\text{Cl}_2$  (3 × 50 mL) and the mixed organic layer was dried over anhydrous  $\text{MgSO}_4$  and filtered. The filtrate was evaporated to remove the solvent and the residue was passed through a flash silica gel column using ethyl acetate as eluent to gain Ir-A3 as an orange solid (0.23 g, 30%).

$^1\text{H}$  NMR (400 MHz,  $\text{CDCl}_3$ )  $\delta$  8.39 (d,  $J$  = 8.2 Hz, 1H), 8.18 (d,  $J$  = 1.7 Hz, 1H), 8.09 (dd,  $J$  = 8.3, 2.2 Hz, 1H), 7.79 – 7.66 (m, 5H), 7.58 (s, 1H), 7.16 (d,  $J$  = 11.5 Hz, 2H), 6.50 (s, 2H), 6.40 (s, 2H), 6.28 (s, 2H), 3.89 (d,  $J$  = 1.2 Hz, 6H), 3.87 (s, 6H), 3.85 (s, 3H), 3.82 (s, 9H), 3.81 – 3.79 (m, 6H), 3.79 (s, 3H), 3.65 (s, 6H), 2.97 (s, 3H), 2.88 (s, 3H).

$^{13}\text{C}$  NMR (100 MHz,  $\text{CDCl}_3$ )  $\delta$  167.24, 166.07, 163.64, 159.30, 159.27, 154.03, 153.77, 153.57, 149.87, 149.80, 148.08, 147.92, 147.61, 146.79, 140.51, 139.79, 137.85, 135.36, 134.34, 133.81, 133.73, 133.44, 133.26, 131.98, 130.76, 129.77,

127.81, 122.42, 118.14, 117.83, 104.87, 104.78, 103.48, 103.25, 103.13, 61.02, 60.92, 60.79, 60.73, 60.57, 60.48, 56.41, 56.25, 56.23, 56.17, 55.89.

Elemental analysis calcd. for  $C_{61}H_{62}IrN_7O_{15}$ : C 55.28, H 4.72, N 7.40; found: C 54.87, H 4.65, N 7.33.

### Ir-B3

It was synthesised according to the preparation procedure of Ir-A3. A red solid of Ir-B3 was obtained in 28% yield.

$^1H$  NMR (400 MHz,  $CDCl_3$ )  $\delta$  8.29 (d,  $J$  = 8.3 Hz, 1H), 8.10 (d,  $J$  = 1.2 Hz, 1H), 7.97 (dd,  $J$  = 8.3, 1.9 Hz, 1H), 7.76 (d,  $J$  = 1.4 Hz, 1H), 7.68 – 7.55 (m, 5H), 7.16 (s, 1H), 7.12 (s, 1H), 6.46 (s, 2H), 6.32 (s, 2H), 6.19 (s, 2H), 4.03 – 3.84 (m, 22H), 3.72 (t,  $J$  = 6.2 Hz, 4H), 3.33 (dd,  $J$  = 14.1, 8.9 Hz, 1H), 3.23 (dd,  $J$  = 14.4, 8.5 Hz, 1H), 2.70 (d,  $J$  = 3.9 Hz, 2H), 1.76 (dddd,  $J$  = 25.3, 20.0, 15.9, 7.9 Hz, 30H), 1.50 (s, 15H), 1.41 – 0.96 (m, 75H), 0.95 – 0.82 (m, 45H).

$^{13}C$  NMR (100 MHz,  $CDCl_3$ )  $\delta$  166.89, 165.57, 163.43, 159.19, 158.88, 153.94, 153.59, 153.42, 149.71, 149.60, 148.16, 147.91, 147.25, 146.67, 144.43, 143.29, 140.40, 139.83, 139.44, 138.52, 138.15, 137.98, 135.28, 134.66, 134.09, 133.75, 133.22, 131.52, 130.53, 129.66, 128.52, 121.99, 118.12, 117.65, 106.95, 105.54, 104.65, 104.57, 73.95, 73.59, 73.49, 73.47, 73.25, 73.07, 70.00, 69.29, 68.94, 68.81, 31.97, 31.94, 31.80, 31.75, 31.73, 31.66, 31.57, 30.46, 30.41, 30.29, 30.24, 30.22, 29.76, 29.60, 29.52, 29.41, 29.35, 26.01, 25.95, 25.92, 25.86, 25.80, 25.74, 25.72, 25.49, 25.43, 22.71, 22.68, 22.65, 22.64, 22.63, 22.60, 14.08, 14.06, 14.05, 14.02, 14.01.

Elemental analysis calcd. for  $C_{136}H_{212}IrN_7O_{15}$ : C 68.71, H 8.99, N 4.12; found: C 68.61, H 8.86, N 4.06.

### Ir-C3

It was synthesised according to the preparation procedure of Ir-A3. A red solid of Ir-C3 was obtained in 33% yield.

$^1H$  NMR (400 MHz,  $CDCl_3$ )  $\delta$  8.27 (d,  $J$  = 8.3 Hz, 1H), 8.09 (s, 1H), 7.96 (d,  $J$  = 8.3 Hz, 1H), 7.76 (s, 1H), 7.66 – 7.48 (m, 5H), 7.13 (d,  $J$  = 15.9 Hz, 2H), 6.46 (s, 2H), 6.32 (s, 2H), 6.19 (s, 2H), 4.05 – 3.83 (m, 22H), 3.70 (s, 4H), 3.27 (d,  $J$  = 36.6 Hz, 2H), 2.70 (s, 2H), 1.80 (d,  $J$  = 8.3 Hz, 26H), 1.47 (d,  $J$  = 15.0 Hz, 18H), 1.24 (d,  $J$  = 10.1 Hz, 256H), 0.88 (dd,  $J$  = 8.0, 5.5 Hz, 45H).

$^{13}C$  NMR (100 MHz,  $CDCl_3$ )  $\delta$  166.86, 165.54, 163.41, 159.17, 158.87, 153.96, 153.60, 153.43, 149.71, 149.62, 148.21, 147.88, 147.23, 146.67, 144.45, 143.31, 140.41, 139.83, 139.47, 138.56, 138.16, 137.95, 135.26, 134.66, 134.04, 133.79, 133.18, 131.47, 130.90, 130.52, 129.63, 128.82, 128.55, 122.07, 118.11, 117.66, 106.95, 105.53, 104.59, 73.97, 73.61, 73.51, 73.28, 73.08, 70.02, 69.31, 68.95, 68.83, 31.98, 31.95, 30.35, 30.33, 29.88, 29.82, 29.79, 29.77, 29.75, 29.71, 29.64, 29.57, 29.53, 29.51, 29.48, 29.43, 29.41, 26.42, 26.33, 26.27, 26.20, 26.13, 22.71, 14.12.

Elemental analysis calcd. for  $C_{226}H_{392}IrN_7O_{15}$ : C 74.58, H 10.86, N 2.69; found: C 74.49, H 10.73, N 2.58.

### Ir-B1

To a mixture of  $IrCl_3$  (0.25 g, 0.85 mmol) and water (2.50 mL) was added a solution of  $HL_6$  (1.00 g, 1.20 mmol) and 2-ethoxyethanol (10.00 mL). The mixture



was stirred under inert gas atmosphere at 130°C for 24 h. After cooled to RT, the colored precipitate was filtered off and was washed with water (10 mL) and ethanol (10 mL) to gain  $[\text{Ir}(\text{ppyC}_6)_2\text{Cl}]_2$  dimmers as a red solid (0.80 g, 0.21mmol) directly used in the following process. A mixture of  $[\text{Ir}(\text{ppyC}_6)_2\text{Cl}]_2$  (0.80 g, 0.21mmol), and tpyppy- $\text{C}_6$  (0.20 g, 0.63 mmol) were stirred in  $\text{CH}_2\text{Cl}_2$  (10 mL) and ethanol (3mL) under argon atmosphere at RT of overnight. The mixture was extracted with  $\text{CH}_2\text{Cl}_2$  ( $3 \times 50$  mL) and the mixed organic layer was dried over anhydrous  $\text{MgSO}_4$  and filtered. The filtrate was evaporated to remove the solvent and the residue was passed through a flash silica gel column using ethyl acetate as eluent to gain Ir-B1 as a red solid (0.25 g, 27%).

$^1\text{H}$  NMR (400 MHz,  $\text{CDCl}_3$ )  $\delta$  8.27 (d,  $J$  = 8.0 Hz, 1H), 7.96 (t,  $J$  = 4.5 Hz, 2H), 7.78 (d,  $J$  = 1.8 Hz, 1H), 7.63 (ddd,  $J$  = 27.3, 16.9, 5.9 Hz, 5H), 7.23 (d,  $J$  = 8.8 Hz, 2H), 7.18 (s, 1H), 7.12 (s, 1H), 6.87 (d,  $J$  = 8.8 Hz, 2H), 6.33 (s, 2H), 6.20 (s, 2H), 4.08 – 3.84 (m, 18H), 3.68 (t,  $J$  = 6.3 Hz, 4H), 3.34 (d,  $J$  = 5.9 Hz, 1H), 3.24 (d,  $J$  = 6.0 Hz, 1H), 2.71 (dd,  $J$  = 15.7, 6.8 Hz, 2H), 1.91 – 1.59 (m, 26H), 1.54 – 1.21 (m, 72H), 1.11 (d,  $J$  = 6.5 Hz, 6H), 0.94 – 0.82 (m, 39H).

$^{13}\text{C}$  NMR (100 MHz,  $\text{CDCl}_3$ )  $\delta$  166.93, 165.53, 163.52, 160.23, 159.24, 159.01, 153.58, 153.44, 149.75, 149.60, 148.33, 147.52, 146.89, 146.69, 144.40, 143.32, 140.60, 139.80, 138.52, 138.08, 137.57, 134.81, 134.02, 133.79, 133.73, 133.10, 131.54, 130.57, 128.77, 127.40, 126.88, 122.19, 118.09, 117.64, 115.29, 106.79, 105.56, 104.61, 104.44, 74.13, 73.59, 73.48, 73.45, 73.08, 69.81, 69.29, 68.86, 68.17, 31.95, 31.87, 31.80, 31.79, 31.75, 31.72, 31.66, 31.57, 30.41, 30.40, 30.22, 29.66, 29.61, 29.42, 29.32, 29.13, 26.00, 25.95, 25.89, 25.84, 25.81, 25.72, 25.70, 25.68, 25.46, 25.43, 22.68, 22.64, 22.61, 22.58, 14.08, 14.06, 14.02.

Elemental analysis calcd. for  $\text{C}_{124}\text{H}_{188}\text{IrN}_7\text{O}_{13}$ : C 68.41, H 8.70, N 4.50; found: C 68.35, H 8.64, N 4.45.

### Ir-C1

It was synthesised according to the preparation procedure of Ir-B1. A red solid of Ir-C1 was obtained in 33% yield.

$^1\text{H}$  NMR (400 MHz,  $\text{CDCl}_3$ )  $\delta$  8.25 (d,  $J$  = 8.1 Hz, 1H), 8.01 – 7.90 (m, 2H), 7.78 (d,  $J$  = 1.7 Hz, 1H), 7.70 – 7.49 (m, 5H), 7.23 (d,  $J$  = 8.8 Hz, 2H), 7.17 (s, 1H), 7.12 (s, 1H), 6.86 (d,  $J$  = 8.8 Hz, 2H), 6.33 (s, 2H), 6.20 (s, 2H), 4.12 – 3.83 (m, 18H), 3.67 (td,  $J$  = 6.0, 2.5 Hz, 4H), 3.28 (dd,  $J$  = 37.1, 6.1 Hz, 2H), 2.80 – 2.65 (m, 2H), 1.93 – 0.93 (m, 260H), 0.88 (dd,  $J$  = 8.0, 5.5 Hz, 39H).

$^{13}\text{C}$  NMR (100 MHz,  $\text{CDCl}_3$ )  $\delta$  166.93, 165.51, 163.51, 160.23, 159.25, 159.01, 153.59, 153.45, 149.75, 149.61, 148.37, 147.53, 146.88, 146.71, 144.45, 143.35, 140.61, 139.80, 138.57, 138.10, 137.53, 134.86, 133.82, 133.11, 131.54, 130.57, 128.78, 127.38, 126.89, 122.21, 118.07, 117.63, 115.29, 106.87, 105.59, 104.64, 104.44, 74.12, 73.61, 73.50, 73.46, 73.08, 69.89, 69.32, 68.88, 68.22, 31.97, 31.96, 31.94, 30.52, 30.32, 29.85, 29.81, 29.76, 29.73, 29.70, 29.66, 29.64, 29.57, 29.51, 29.48, 29.46, 29.41, 29.40, 29.37, 29.24, 26.39, 26.33, 26.24, 26.20, 26.12, 26.10, 26.08, 25.82, 25.80, 22.69, 14.11.

Elemental analysis calcd. for  $\text{C}_{202}\text{H}_{344}\text{IrN}_7\text{O}_{13}$ : C 74.17, H 10.60, N 3.00; found: C 74.06, H 10.52, N 2.97.

## Ir-B

To a mixture of  $\text{IrCl}_3$  (0.25 g, 0.85 mmol) and water (2.50 mL) was added a solution of  $\text{HL}_6$  (1.00 g, 1.20 mmol) and 2-ethoxyethanol (10.00 mL). The mixture was stirred under inert gas atmosphere at 130 °C for 24 h. After cooled to RT, the colored precipitate was filtered off and was washed with water (10 mL) and ethanol (10 mL) to gain  $[\text{Ir}(\text{ppyC}_6)_2\text{Cl}]_2$  dimmers as a red solid (0.80 g, 0.21mmol) directly used in the following process. A mixture of  $[\text{Ir}(\text{ppyC}_6)_2\text{Cl}]_2$  (0.80 g, 0.21mmol), and tpyppy (0.14 g, 0.63 mmol) were stirred in  $\text{CH}_2\text{Cl}_2$  (10 mL) and ethanol (3mL) under argon atmosphere at RT of overnight. The mixture was extracted with  $\text{CH}_2\text{Cl}_2$  (3×50 mL) and the mixed organic layer was dried over anhydrous  $\text{MgSO}_4$  and filtered. The filtrate was evaporated to remove the solvent and the residue was passed through a flash silica gel column using ethyl acetate as eluent to gain Ir-B as a red solid (0.31g, 35%).

$^1\text{H}$  NMR (400 MHz,  $\text{CDCl}_3$ )  $\delta$  8.31 (d,  $J$  = 9.0 Hz, 1H), 8.06 – 7.99 (m, 2H), 7.79 (d,  $J$  = 1.5 Hz, 1H), 7.70 – 7.54 (m, 5H), 7.42 – 7.36 (m, 3H), 7.32 (d,  $J$  = 1.4 Hz, 2H), 7.19 (s, 1H), 7.13 (s, 1H), 6.33 (s, 2H), 6.20 (s, 2H), 4.12 – 3.84 (m, 16H), 3.68 (t,  $J$  = 6.2 Hz, 4H), 3.34 (d,  $J$  = 5.9 Hz, 1H), 3.25 (d,  $J$  = 6.1 Hz, 1H), 2.80 – 2.62 (m, 2H), 1.69 (ddd,  $J$  = 29.4, 17.1, 6.7 Hz, 22H), 1.55 – 1.21 (m, 61H), 1.11 (d,  $J$  = 6.6 Hz, 4H), 1.05 – 0.81 (m, 40H), 0.78 (d,  $J$  = 3.1 Hz, 6H).

$^{13}\text{C}$  NMR (100 MHz,  $\text{CDCl}_3$ )  $\delta$  166.91, 165.52, 163.44, 159.24, 159.01, 153.59, 153.44, 149.80, 149.63, 148.43, 148.32, 147.52, 146.71, 144.42, 143.30, 140.55, 139.78, 138.49, 138.08, 137.82, 135.68, 134.96, 134.63, 134.12, 133.81, 133.18, 131.57, 130.56, 129.40, 129.29, 128.64, 126.28, 122.21, 118.12, 117.67, 106.77, 105.51, 104.57, 104.48, 74.15, 73.56, 73.49, 73.45, 73.08, 69.75, 69.27, 68.85, 68.78, 31.96, 31.88, 31.81, 31.76, 31.72, 31.69, 31.66, 31.54, 30.42, 30.38, 30.21, 29.65, 29.62, 29.60, 29.42, 29.29, 25.96, 25.86, 25.81, 25.73, 25.70, 25.47, 25.44, 22.69, 22.65, 22.62, 14.07, 14.03.

Elemental analysis calcd. for  $\text{C}_{118}\text{H}_{176}\text{IrN}_7\text{O}_{12}$ : C 68.24, H 8.54, N 4.72; found: C 68.17, H 8.37, N 4.63.

## Ir-C

It was synthesised according to the preparation procedure of Ir-B. A red solid of Ir-C was obtained in 30% yield.

$^1\text{H}$  NMR (400 MHz,  $\text{CDCl}_3$ )  $\delta$  8.30 (d,  $J$  = 8.8 Hz, 1H), 8.01 (d,  $J$  = 7.2 Hz, 2H), 7.78 (s, 1H), 7.67 – 7.51 (m, 5H), 7.38 (d,  $J$  = 4.7 Hz, 3H), 7.31 (d,  $J$  = 3.8 Hz, 2H), 7.18 (s, 1H), 7.12 (s, 1H), 6.33 (s, 2H), 6.20 (s, 2H), 4.11 – 3.83 (m, 16H), 3.68 (d,  $J$  = 4.6 Hz, 4H), 3.37 – 3.19 (m, 2H), 2.71 (dd,  $J$  = 16.3, 6.8 Hz, 2H), 1.80 (d,  $J$  = 6.9 Hz, 9H), 1.63 (dt,  $J$  = 13.9, 11.0 Hz, 18H), 1.48 (dd,  $J$  = 13.8, 5.5 Hz, 11H), 1.34 (d,  $J$  = 61.1 Hz, 202H), 0.88 (t,  $J$  = 6.6 Hz, 36H).

$^{13}\text{C}$  NMR (100 MHz,  $\text{CDCl}_3$ )  $\delta$  166.92, 165.52, 163.42, 159.26, 159.00, 153.61, 153.45, 149.81, 149.64, 148.47, 148.35, 147.49, 146.74, 144.49, 143.36, 140.57, 139.77, 138.60, 138.15, 137.76, 135.66, 134.99, 134.69, 134.10, 133.82, 133.17, 131.57, 130.53, 129.39, 129.24, 128.65, 126.26, 122.22, 118.08, 117.64, 106.86, 105.58, 104.64, 104.54, 74.14, 73.59, 73.50, 73.46, 73.08, 69.83, 69.33, 68.90, 31.97,

31.93, 30.52, 30.49, 30.33, 29.85, 29.74, 29.70, 29.68, 29.63, 29.60, 29.57, 29.52, 29.45, 29.38, 26.33, 26.28, 26.24, 26.20, 26.12, 26.10, 25.82, 22.69, 14.11.

Elemental analysis calcd. for  $C_{190}H_{320}IrN_7O_{12}$ : C 73.93, H 10.45, N 3.18; found: C 73.85, H 10.34, N 3.16.

## 2. $^1\text{H}$ NMR and $^{13}\text{C}$ NMR spectra of all complexes

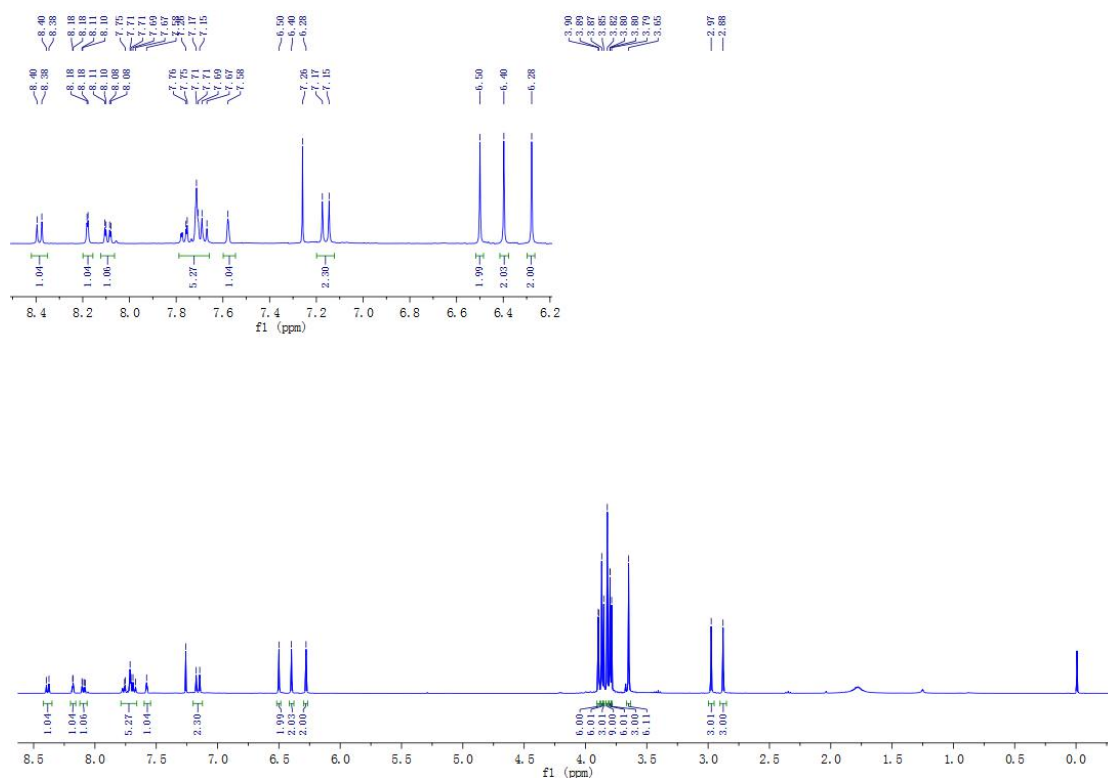

$^1\text{H}$  NMR (400 MHz,  $\text{CDCl}_3$ ) spectrum of complex Ir-A3.

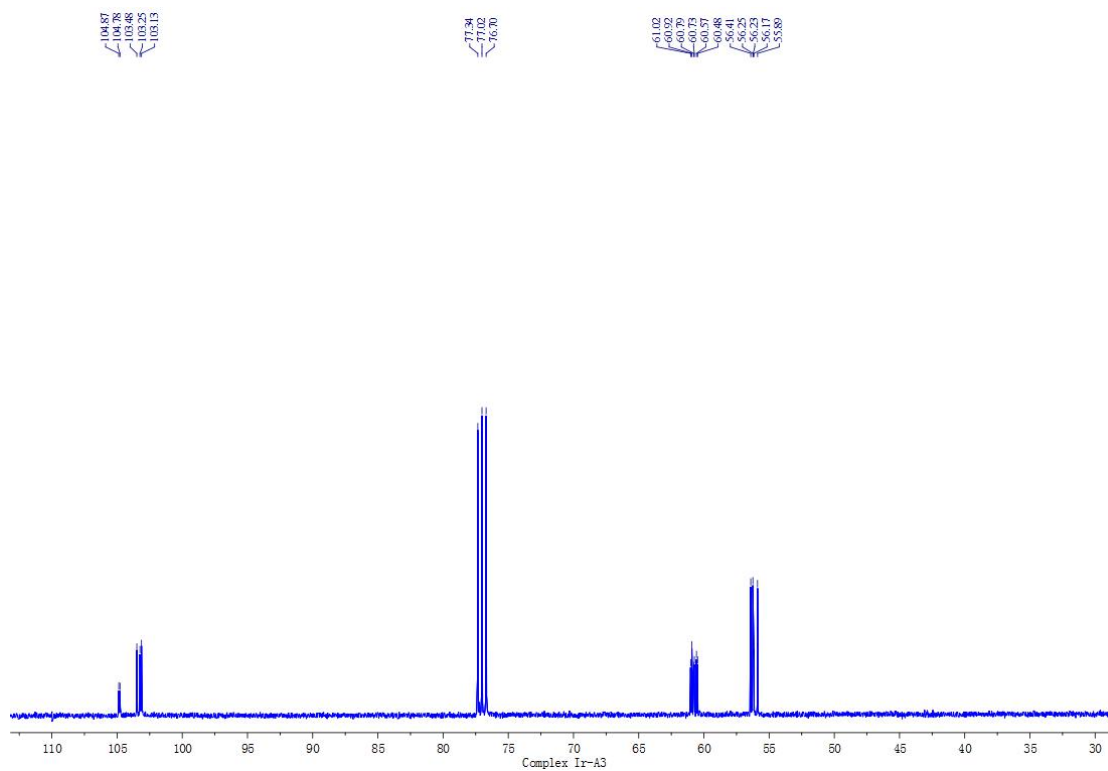

$^{13}\text{C}$  NMR (100 MHz,  $\text{CDCl}_3$ ) spectrum of complex Ir-A3.

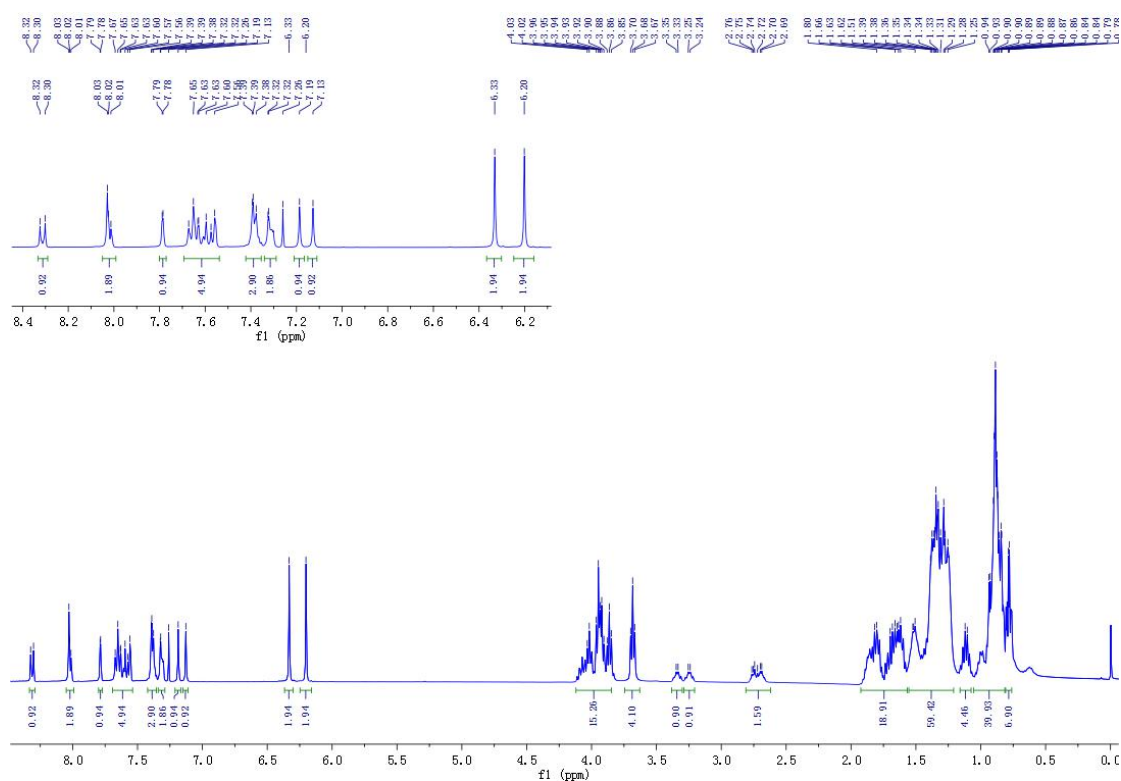

<sup>1</sup>H NMR (400 MHz, CDCl<sub>3</sub>) spectrum of complex Ir-B.

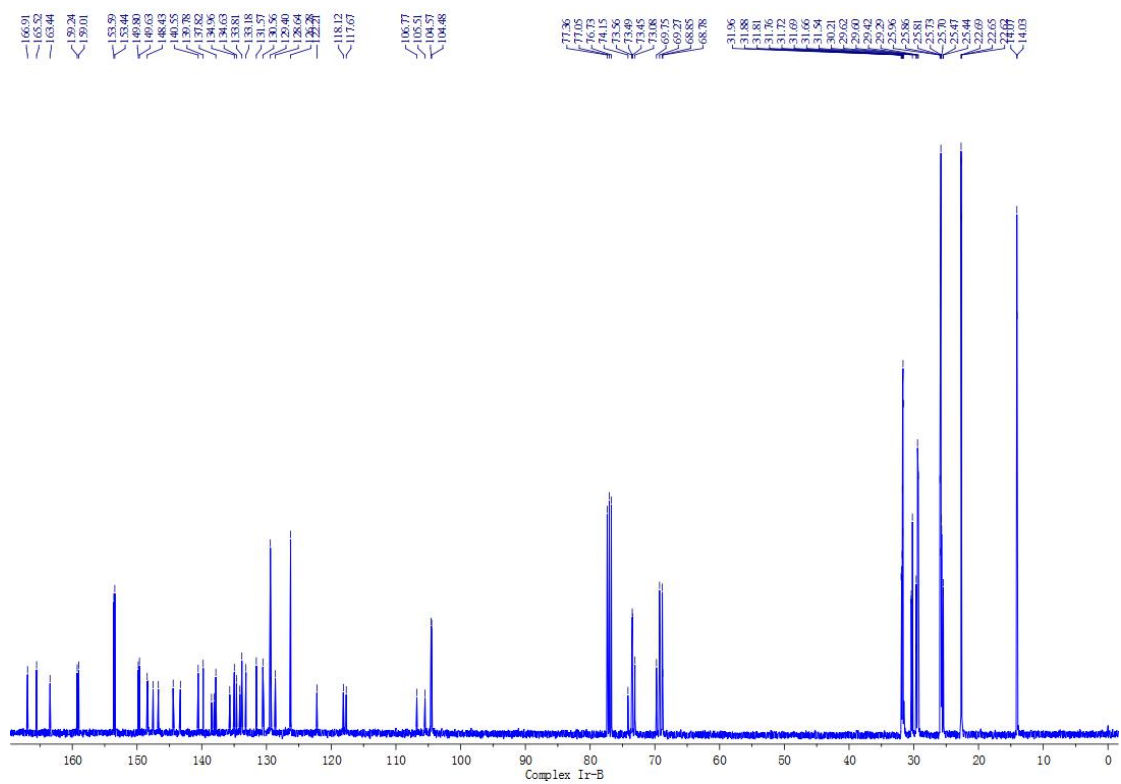

<sup>13</sup>C NMR (100 MHz, CDCl<sub>3</sub>) spectrum of complex Ir-B.

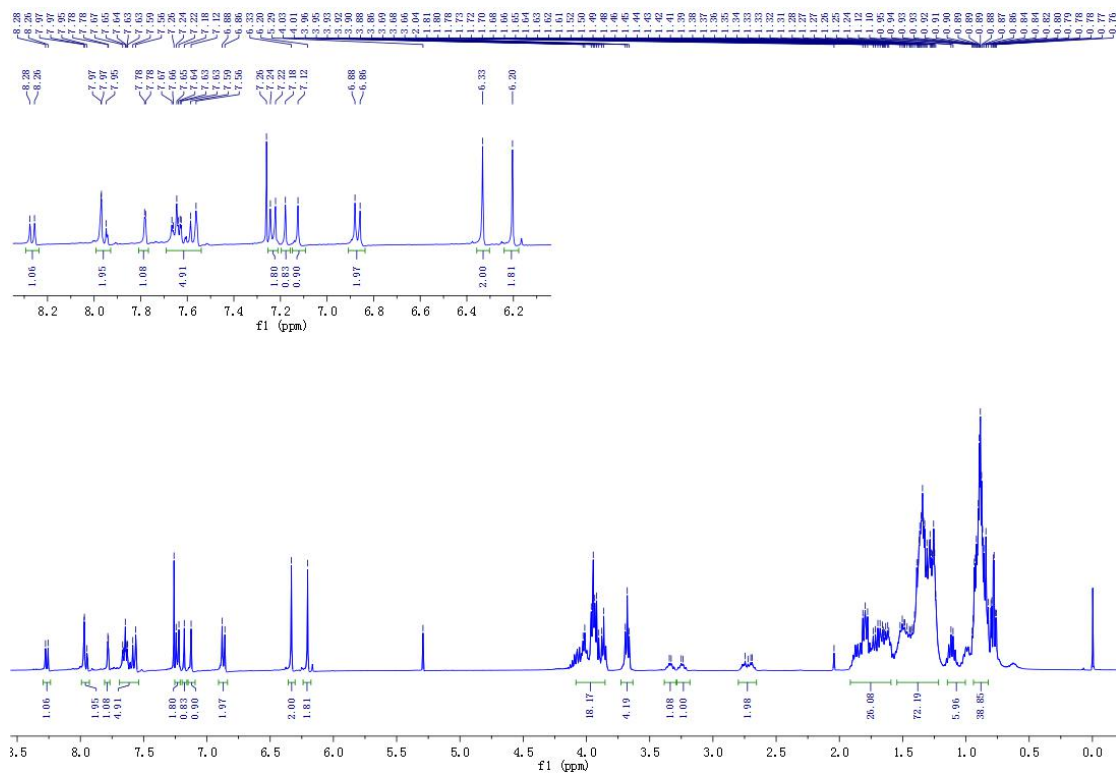

<sup>1</sup>H NMR (400 MHz, CDCl<sub>3</sub>) spectrum of complex Ir-B1.

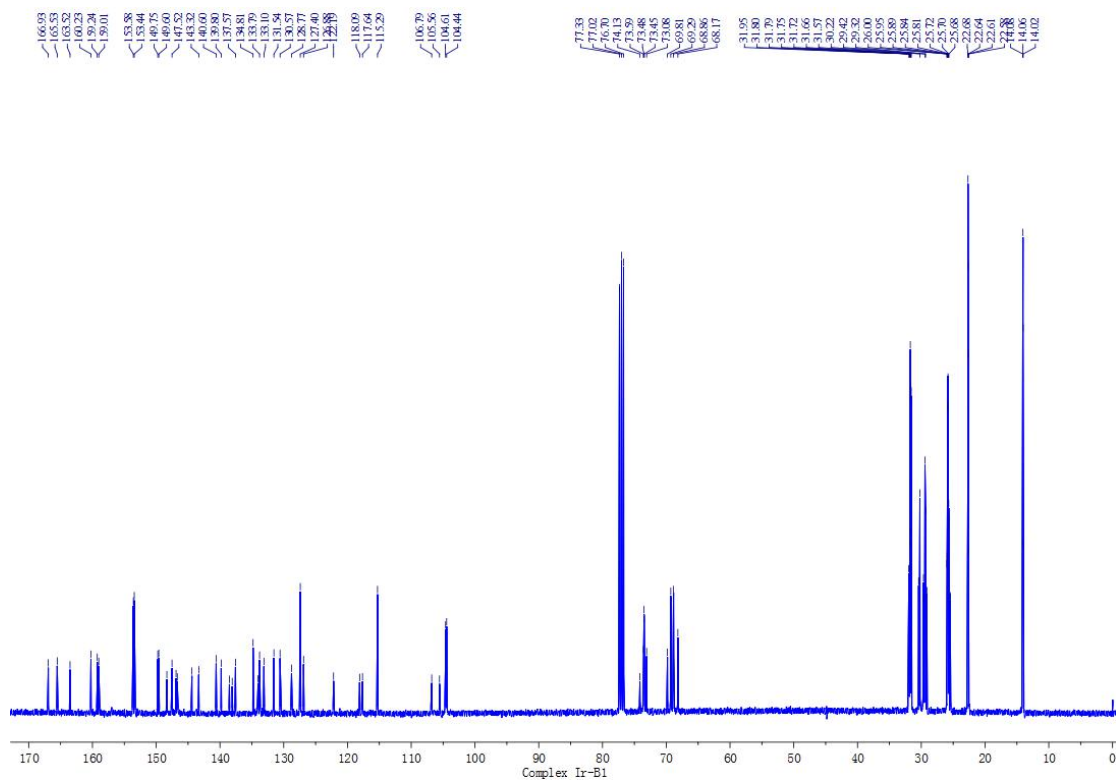

<sup>13</sup>C NMR (100 MHz, CDCl<sub>3</sub>) spectrum of complex Ir-B1.

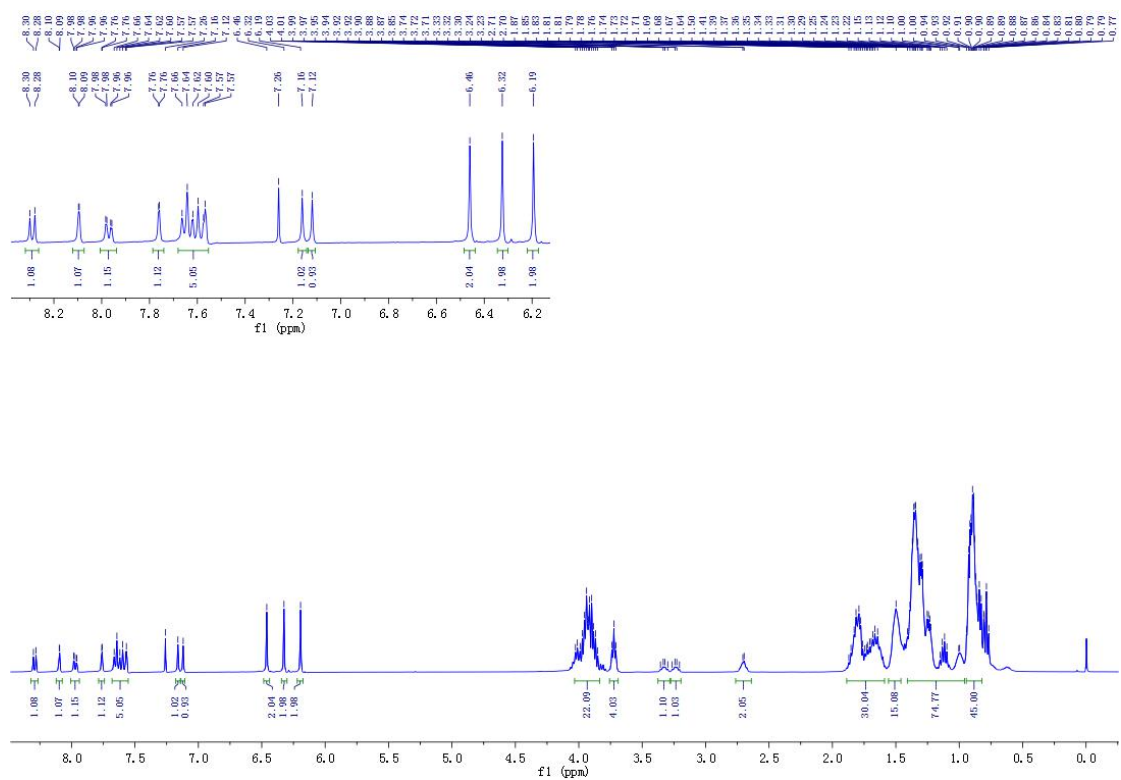

<sup>1</sup>H NMR (400 MHz, CDCl<sub>3</sub>) spectrum of complex Ir-B3.

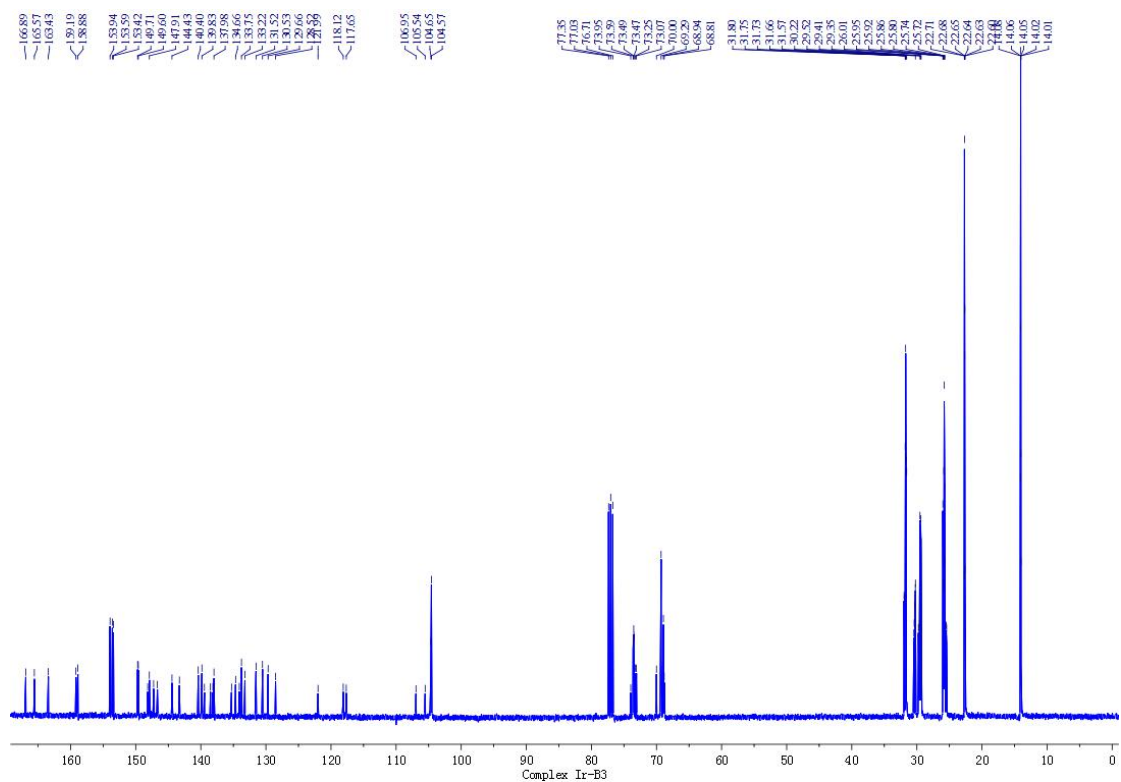

<sup>13</sup>C NMR (100 MHz, CDCl<sub>3</sub>) spectrum of complex Ir-B3.

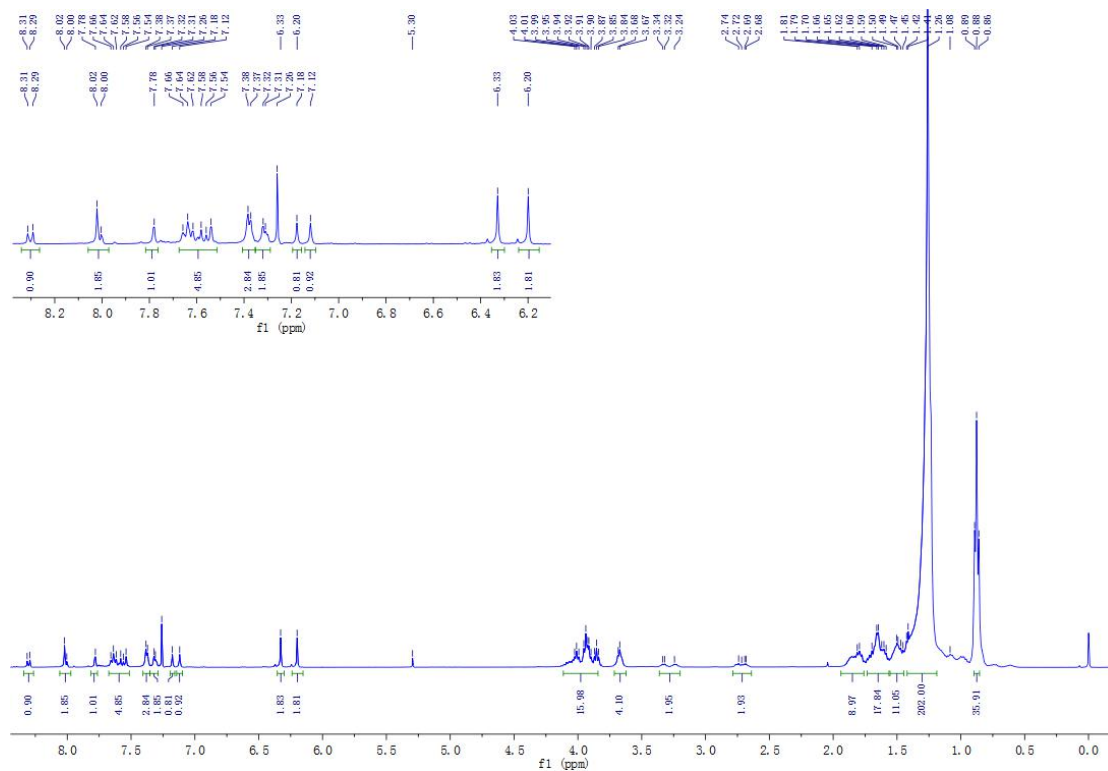

$^1\text{H}$  NMR (400 MHz,  $\text{CDCl}_3$ ) spectrum of complex Ir-C.

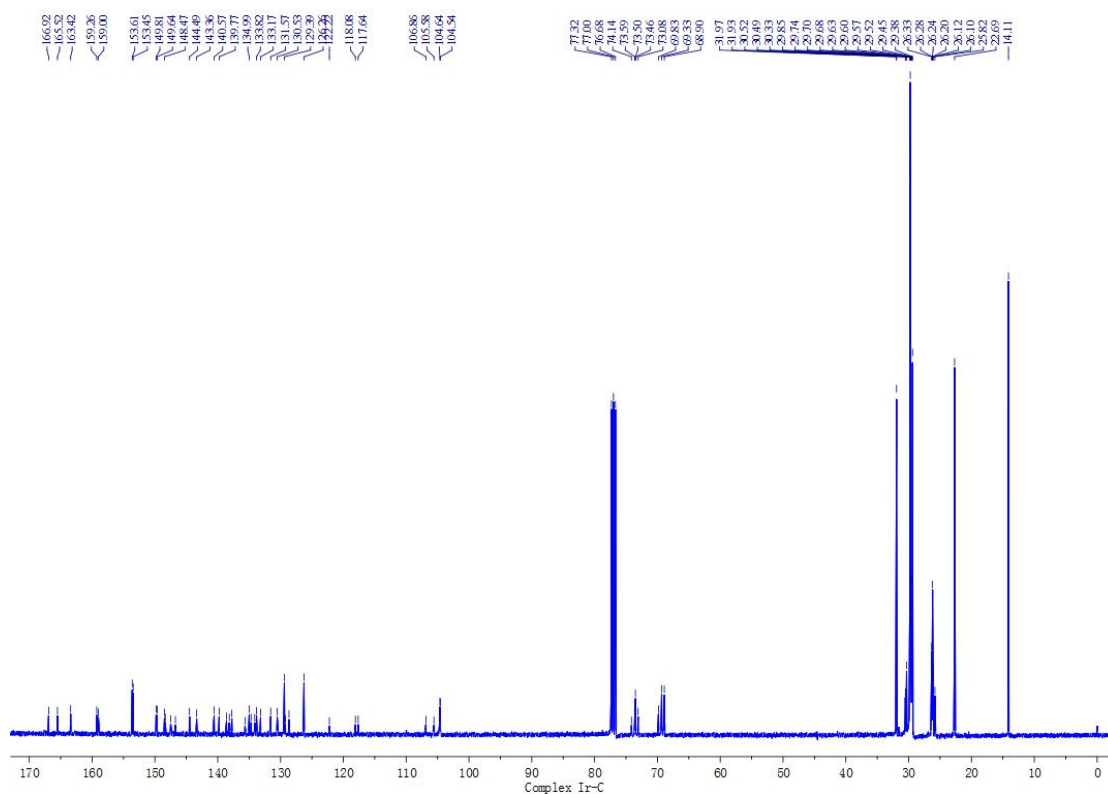

$^{13}\text{C}$  NMR (100 MHz,  $\text{CDCl}_3$ ) spectrum of complex Ir-C.



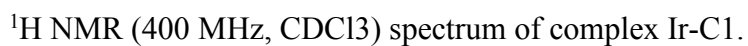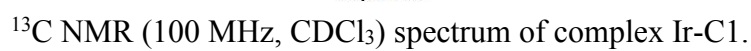

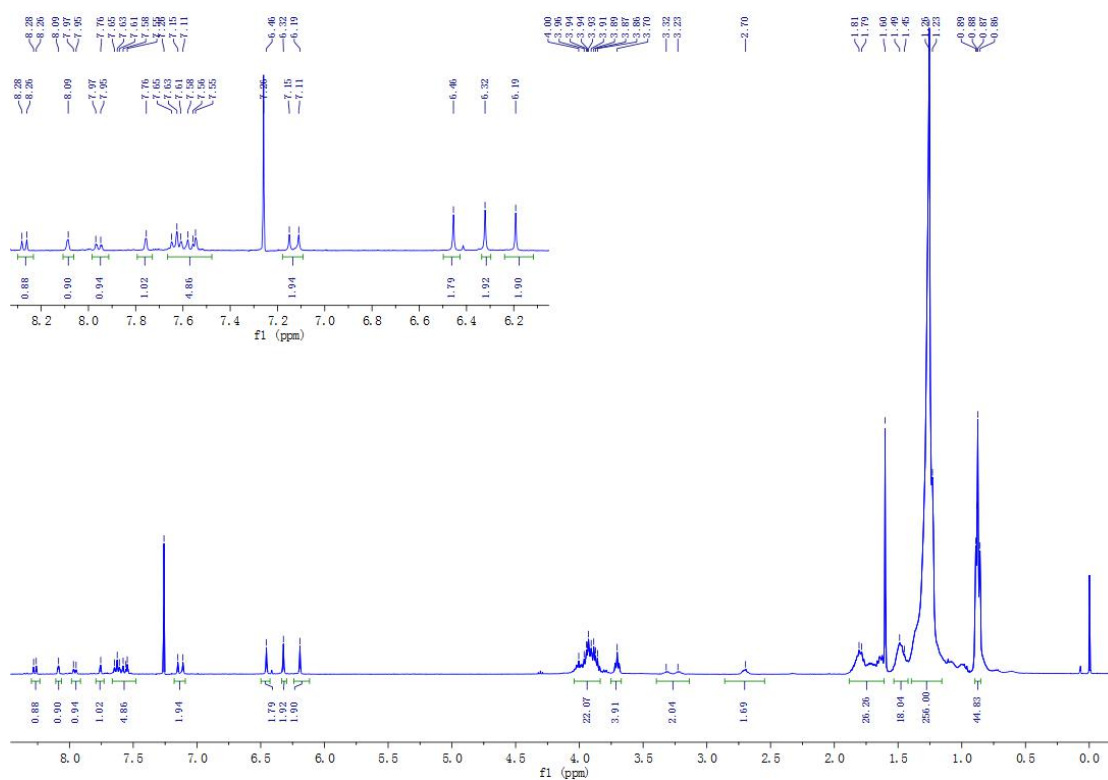

<sup>1</sup>H NMR (400 MHz, CDCl<sub>3</sub>) spectrum of complex Ir-C3.

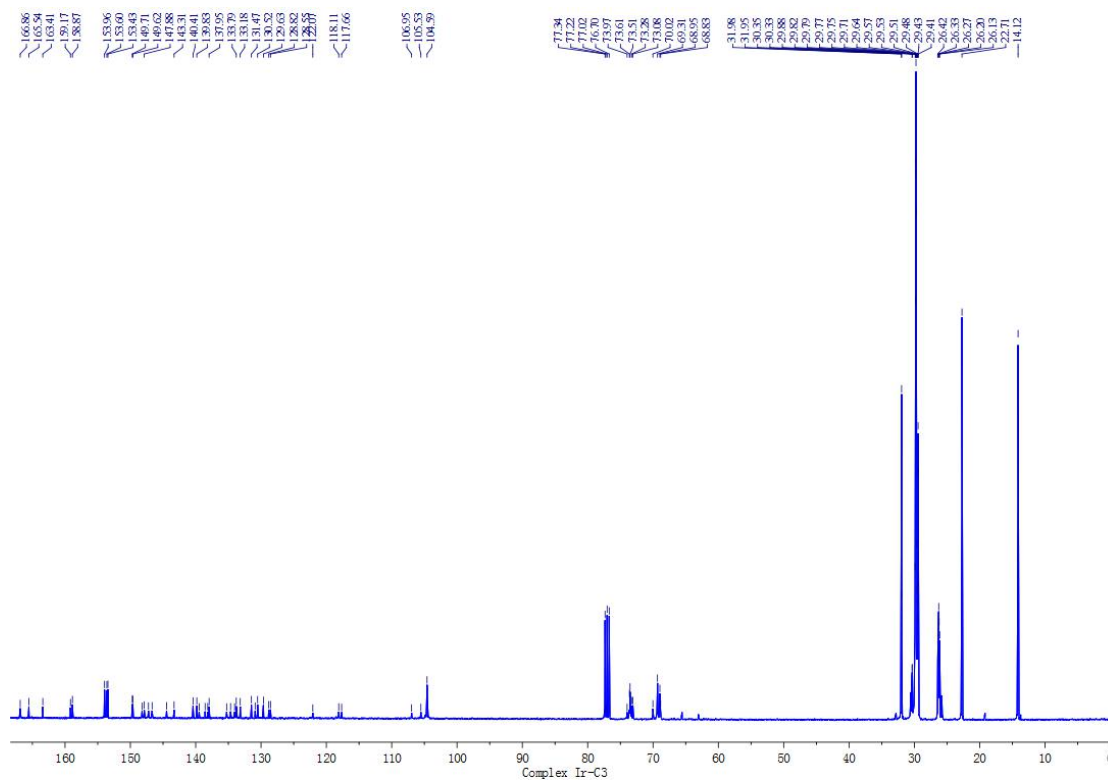

<sup>13</sup>C NMR (100 MHz, CDCl<sub>3</sub>) spectrum of complex Ir-C3.

### 3. The crystallographic data, selected bond lengths and angles of Ir-A3.

| <b>Table S1.</b> The detailed crystallographic data of complex Ir-A3. |                                                                  |
|-----------------------------------------------------------------------|------------------------------------------------------------------|
| Empirical formula                                                     | C <sub>61</sub> H <sub>62</sub> IrN <sub>7</sub> O <sub>15</sub> |
| Formula weight                                                        | 1325.37                                                          |
| Temperature/K                                                         | 150                                                              |
| Crystal system                                                        | triclinic                                                        |
| Space group                                                           | P $\bar{1}$                                                      |
| a/Å                                                                   | 14.7045(4)                                                       |
| b/Å                                                                   | 14.9110(5)                                                       |
| c/Å                                                                   | 17.8440(6)                                                       |
| $\alpha$ /°                                                           | 79.706(3)                                                        |
| $\beta$ /°                                                            | 78.030(3)                                                        |
| $\gamma$ /°                                                           | 81.738(3)                                                        |
| Volume/Å <sup>3</sup>                                                 | 3742.6(2)                                                        |
| Z                                                                     | 2                                                                |
| $\rho_{\text{calc}}$ /g/cm <sup>3</sup>                               | 1.176                                                            |
| $\mu$ /mm <sup>-1</sup>                                               | 3.938                                                            |
| F(000)                                                                | 1348.0                                                           |
| Crystal size/mm <sup>3</sup>                                          | 0.7 × 0.4 × 0.15                                                 |
| Radiation                                                             | CuK $\alpha$ ( $\lambda$ = 1.54184)                              |
| 2 $\theta$ range for data collection/                                 | 8.168 to 130.172                                                 |
| Index ranges                                                          | -11 ≤ h ≤ 17, -17 ≤ k ≤ 17, -19 ≤ l ≤ 20                         |
| Reflections collected                                                 | 38444                                                            |
| Independent reflections                                               | 12744 [R <sub>int</sub> = 0.0602, R <sub>sigma</sub> = 0.0498]   |
| Data/restraints/parameters                                            | 12744/0/772                                                      |
| Goodness-of-fit on F <sup>2</sup>                                     | 1.039                                                            |
| Final R indexes [I ≥ 2 $\sigma$ (I)]                                  | R <sub>1</sub> = 0.0498, wR <sub>2</sub> = 0.1343                |
| Final R indexes [all data]                                            | R <sub>1</sub> = 0.0522, wR <sub>2</sub> = 0.1377                |
| Largest diff. peak/hole / e Å <sup>-3</sup>                           | 3.12/-1.45                                                       |

| <b>Table S2.</b> Selected bond lengths and angles of complex Ir-A3.                                                     |                          |                          |                |                         |                         |
|-------------------------------------------------------------------------------------------------------------------------|--------------------------|--------------------------|----------------|-------------------------|-------------------------|
|                                                                                                                         | lengths (Å) <sup>a</sup> | lengths (Å) <sup>b</sup> |                | angles (°) <sup>a</sup> | angles (°) <sup>b</sup> |
| Ir01-C01C                                                                                                               | 2.039(4)                 | 2.0358                   | C00U-Ir01-C01C | 90.56(17)               | 90.4197                 |
| Ir01-C00U                                                                                                               | 2.049(4)                 | 2.0505                   | N00M-Ir01-N00N | 94.38(14)               | 93.0017                 |
| Ir01-N00H                                                                                                               | 2.056(3)                 | 2.0743                   | N00L-Ir01-N00N | 85.87(15)               | 89.7447                 |
| Ir01-N00N                                                                                                               | 2.064(3)                 | 2.0682                   | N00L-Ir01-N00H | 92.71(15)               | 91.0424                 |
| Ir01-N00M                                                                                                               | 2.183(3)                 | 2.2083                   | N00H-Ir01-C00U | 79.34(17)               | 79.7396                 |
| Ir01-N00L                                                                                                               | 2.125(3)                 | 2.1608                   | N00L-Ir01-C01C | 97.76(14)               | 102.6064                |
| <sup>a</sup> Data from single crystals structure of Ir-A3. <sup>b</sup> Data from computational investigation of Ir-A3. |                          |                          |                |                         |                         |

#### 4. Photophysical data of iridium(III) complexes.

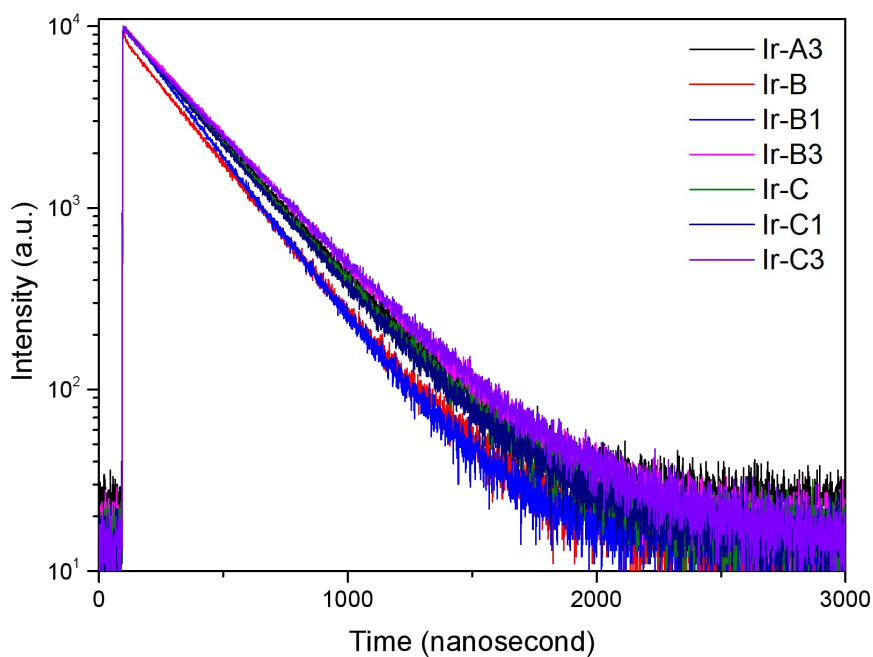

**Figure S1.** Phosphorescence decays of the complexes measured in CH<sub>2</sub>Cl<sub>2</sub> at 25 °C under argon.

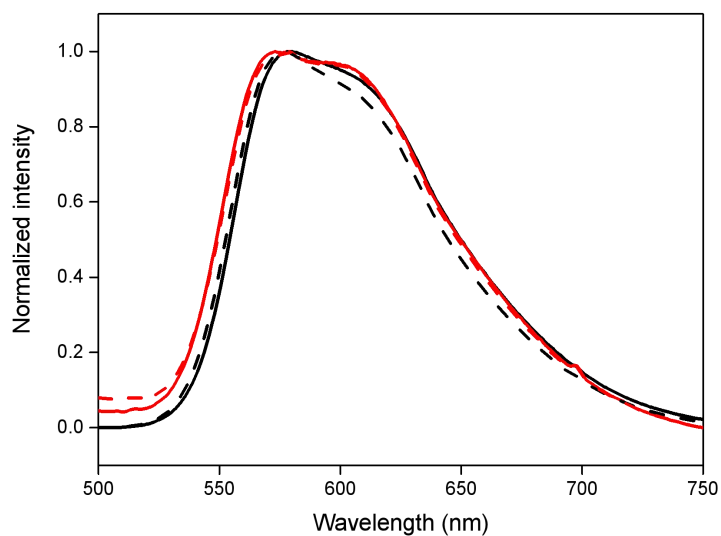

**Figure S2.** The normalized photoluminescence spectra of complexes Ir-C1 (black) and Ir-C3 (red) in the state of amorphous (solid) and liquid crystalline (dash).

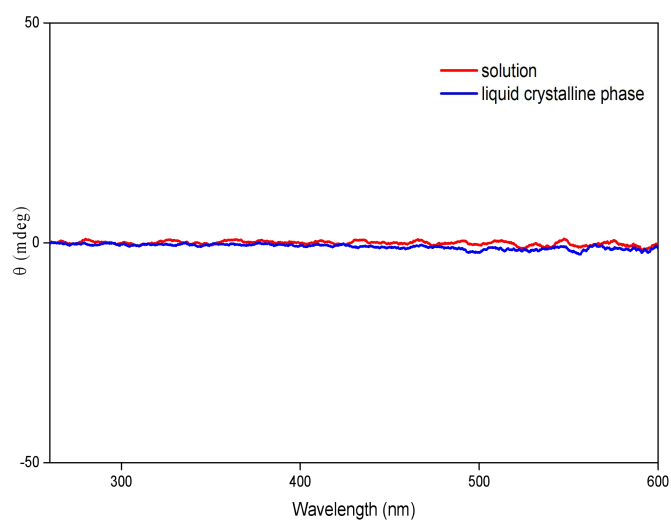

**Figure S3.** The CD spectra in  $\text{CH}_2\text{Cl}_2$  solution (red) and in liquid crystalline phase (blue) at room temperature.

## 5. Cyclic voltammetry (CV) of complex Ir-B3.

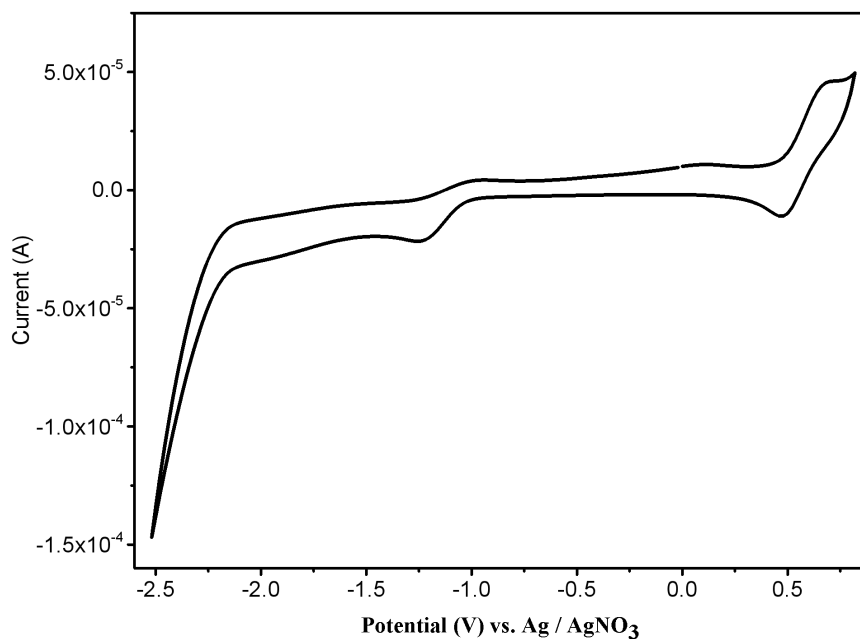

**Figure S4.** Cyclic voltammetry (CV) of complex Ir-B3. CV data were measured in degassed  $\text{CH}_2\text{Cl}_2$  solution ( $M = 1.0 \times 10^{-3} \text{ mol/L}$ ) with Pt wire, Ag/AgNO<sub>3</sub> electrode and Glassy carbon as counter, reference, and working electrodes, respectively. The scan rate was 100 mV/s, and ferrocene was used as a reference.

## 6. Polarized optical micrographs of Ir-C1

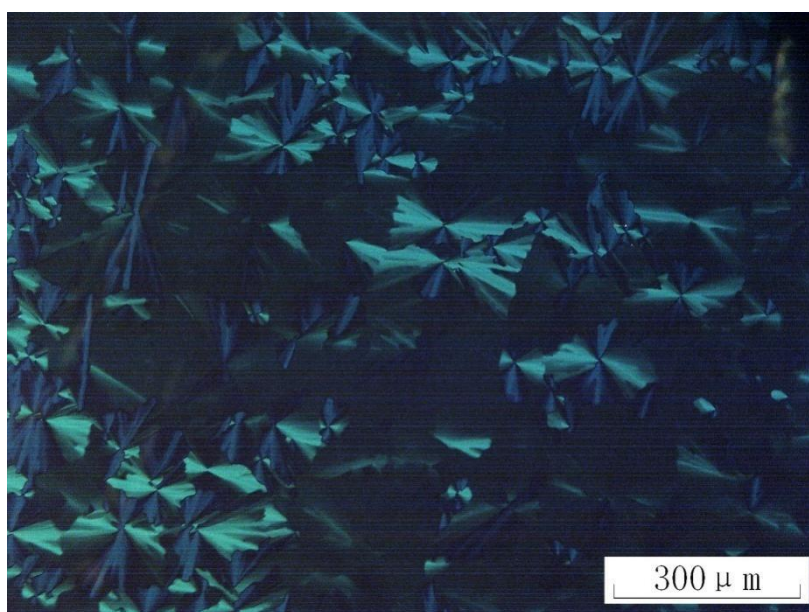

**Figure S5.** Polarized optical micrographs (on cooling) of Ir-C1, 102 °C.

| <b>Table S3.</b> The photoluminescence data of complexes Ir-C1 and Ir-C3 in amorphous and liquid crystalline states at room temperature ( $\lambda_{\text{ex}} = 425 \text{ nm}$ ). |         |        |
|-------------------------------------------------------------------------------------------------------------------------------------------------------------------------------------|---------|--------|
| complex                                                                                                                                                                             | LC (nm) | A (nm) |
| Ir-C1                                                                                                                                                                               | 578     | 579    |
| Ir-C3                                                                                                                                                                               | 579     | 578    |
| LC and A are liquid crystalline phase and amorphous state, respectively.                                                                                                            |         |        |

## 7. DSC curves of iridium(III) complexes

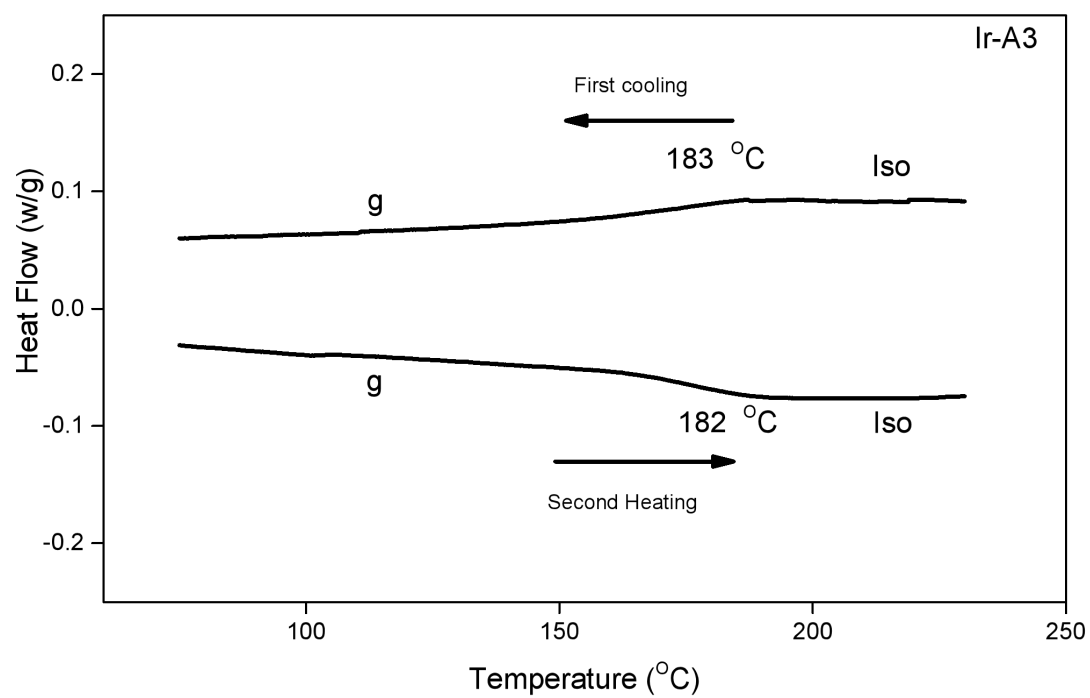

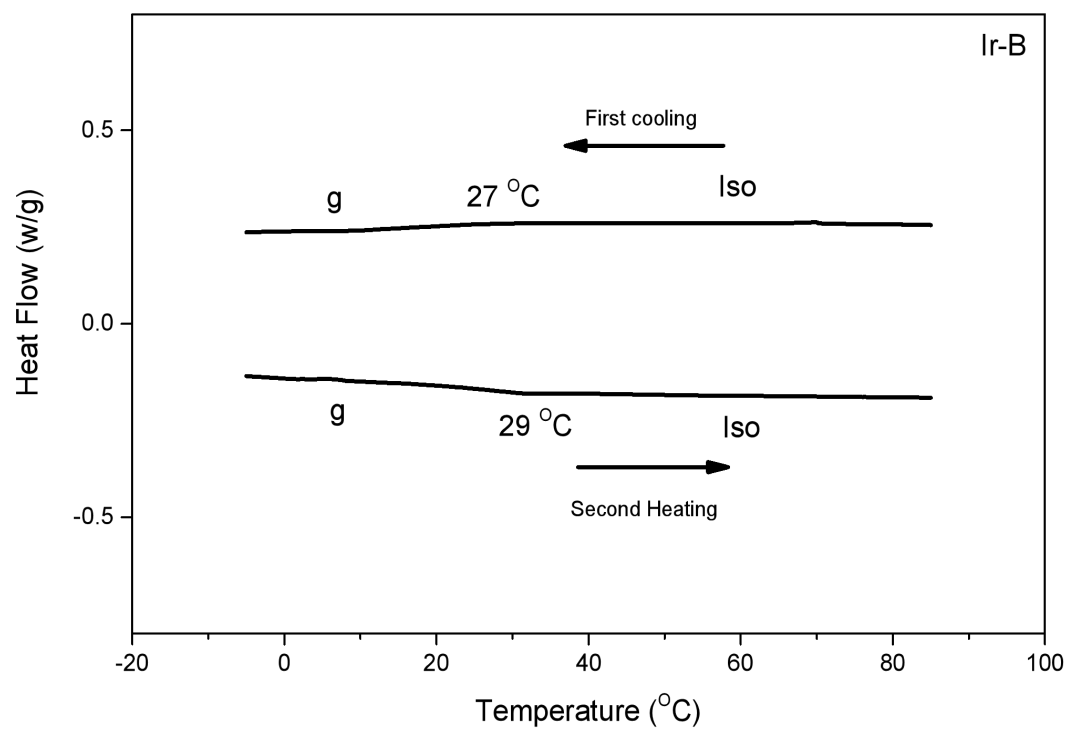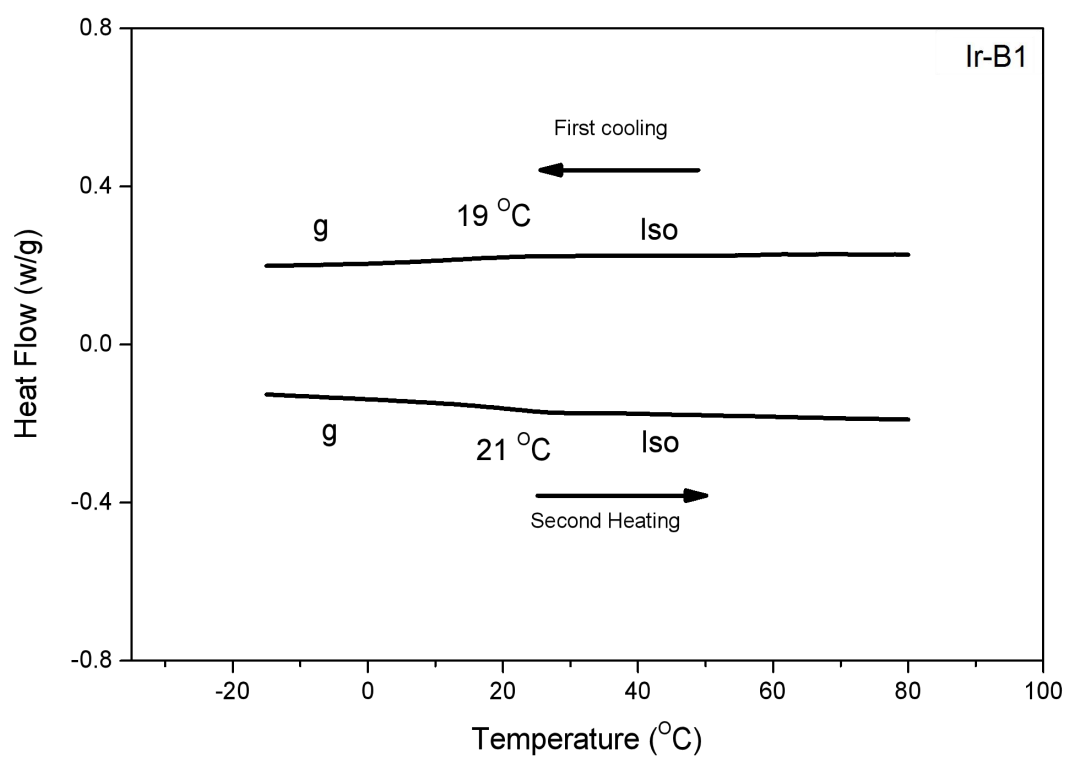



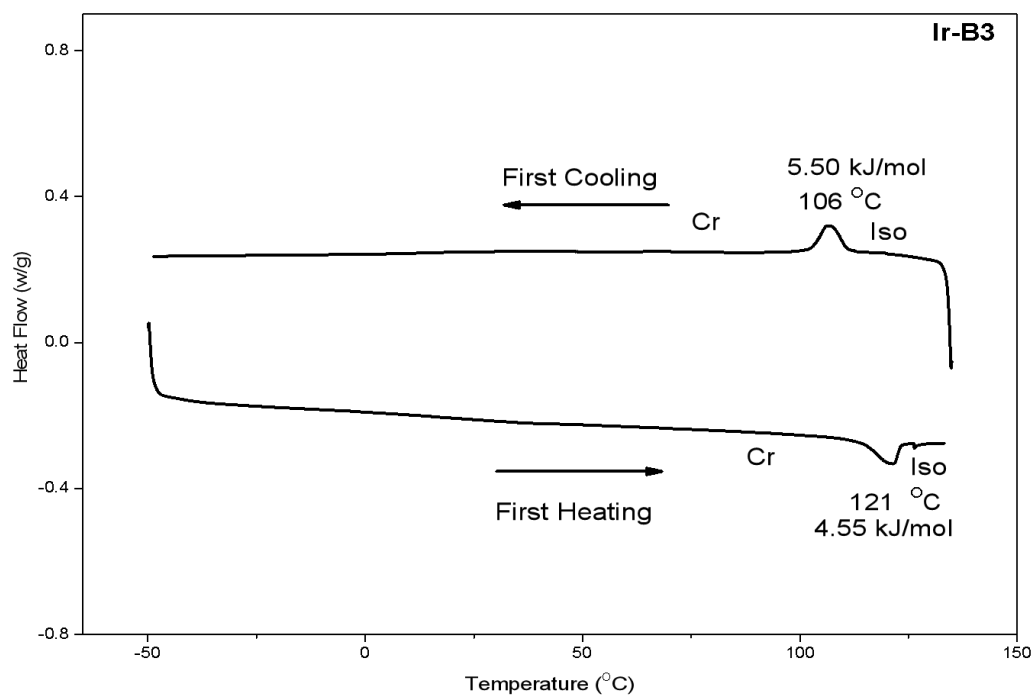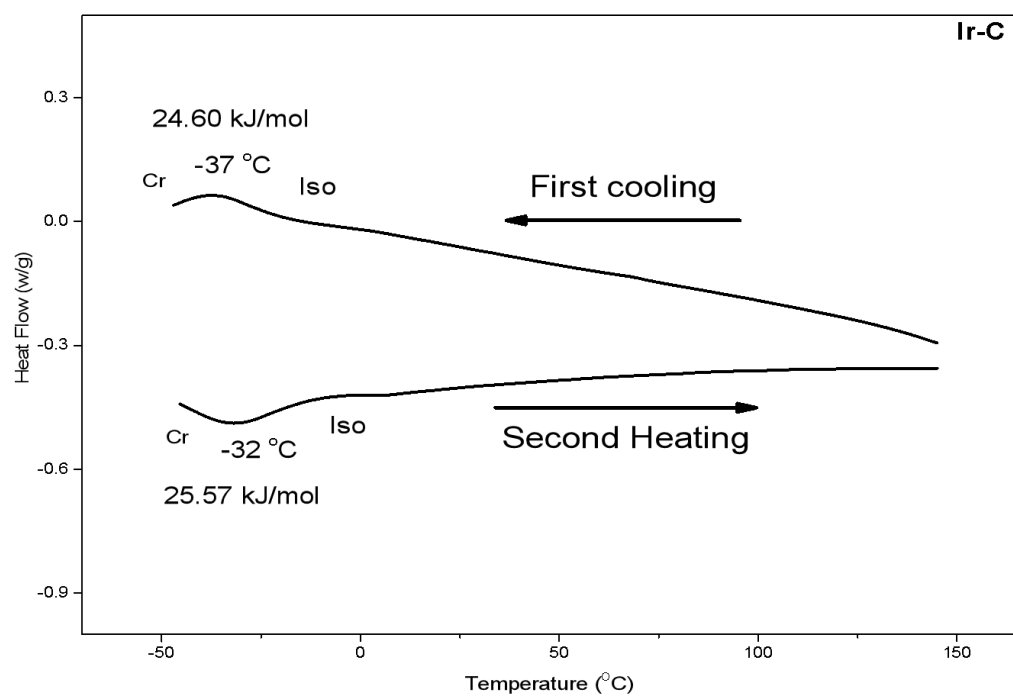

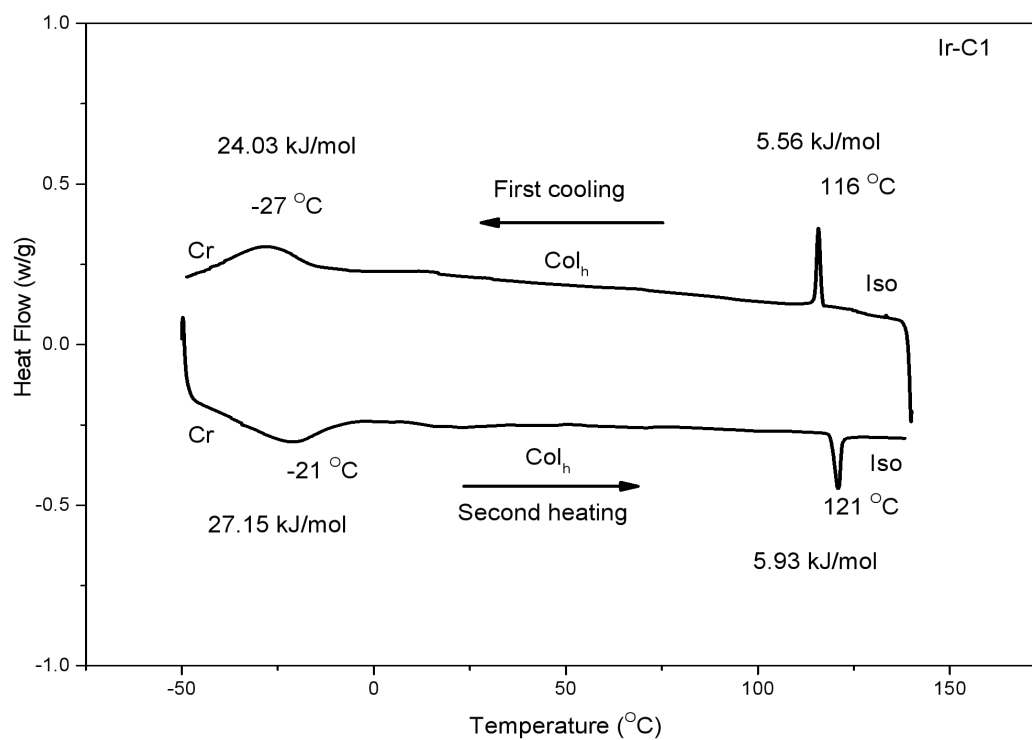

**Figure S6.** DSC spectra of iridium(III) complexes at the scan rate of 10 °C/min under the protection of nitrogen.

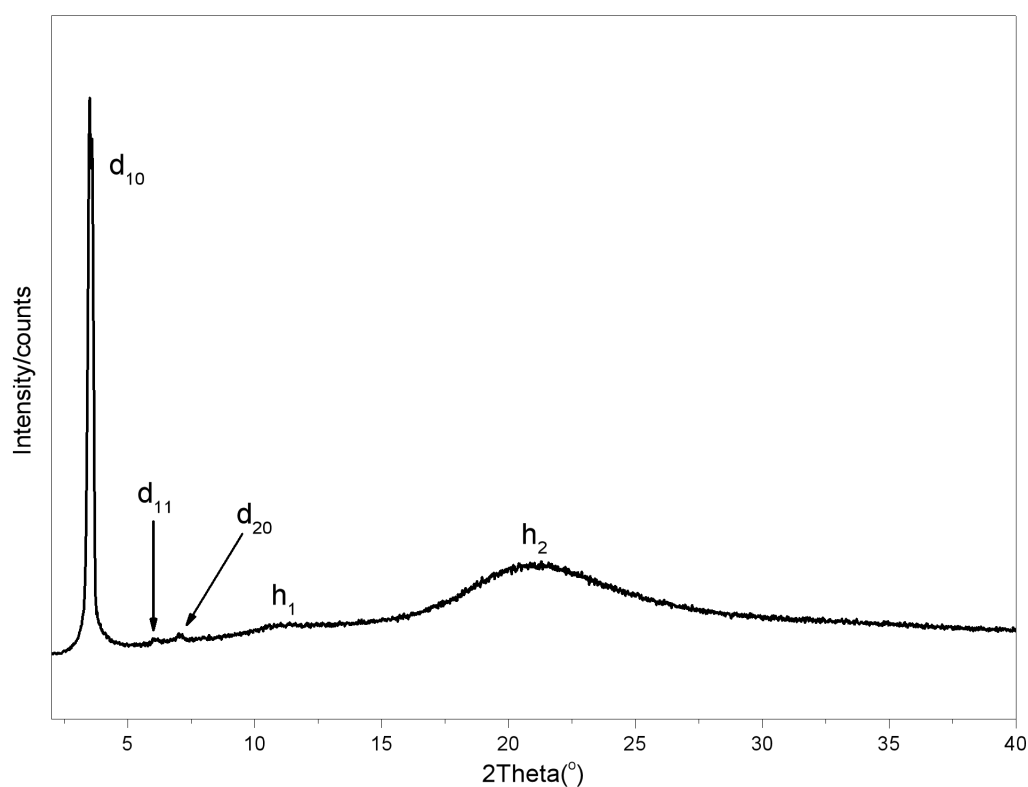

**Figure S7.** The powder XRD patterns of Ir-C1 at room temperature.

## 8. Computed excitation energies and oscillator strengths for complex Ir-A3

**Table S4.** Computed Excitation Energies and Oscillator Strengths for the  $S_0 \rightarrow S_n$  Transitions of the Complex Ir-A3.<sup>a</sup>

| $\lambda(\text{nm})$ | E(eV) | f      | transitions                                                         |
|----------------------|-------|--------|---------------------------------------------------------------------|
| 463.2                | 2.68  | 0.0048 | S1 HOMO $\rightarrow$ LUMO(+98%)                                    |
| 428.6                | 2.89  | 0.1445 | HOMO $\rightarrow$ LUMO+1(+96%)                                     |
| 358.1                | 3.46  | 0.2189 | HOMO-1 $\rightarrow$ LUMO+1(+83%) HOMO-1 $\rightarrow$ LUMO+2(6%)   |
| 351.2                | 3.53  | 0.0913 | HOMO-2 $\rightarrow$ LUMO+1(+54%) HOMO-3 $\rightarrow$ LUMO+1(12%)  |
|                      |       |        | HOMO-2 $\rightarrow$ LUMO+2(11%) HOMO-3 $\rightarrow$ LUMO+2(+6%)   |
| 342.3                | 3.62  | 0.2865 | HOMO-2 $\rightarrow$ LUMO+2(+55%) HOMO-2 $\rightarrow$ LUMO+1(+24%) |
|                      |       |        | HOMO-3 $\rightarrow$ LUMO+2(10%)                                    |
| 336.3                | 3.69  | 0.1034 | HOMO-3 $\rightarrow$ LUMO+1(+63%) HOMO-2 $\rightarrow$ LUMO+1(+9%)  |
|                      |       |        | HOMO-2 $\rightarrow$ LUMO+2(8%)                                     |
| 334.2                | 3.71  | 0.0666 | HOMO-3 $\rightarrow$ LUMO+2(+46%) HOMO-1 $\rightarrow$ LUMO+3(19%)  |
|                      |       |        | HOMO-2 $\rightarrow$ LUMO+2(+12%) HOMO-3 $\rightarrow$ LUMO+2(+7%)  |
| 331.2                | 3.74  | 0.0704 | HOMO-6 $\rightarrow$ LUMO(+31%) HOMO-7 $\rightarrow$ LUMO(15%)      |
|                      |       |        | HOMO-1 $\rightarrow$ LUMO+3(9%) HOMO-3 $\rightarrow$ LUMO+2(9%)     |
|                      |       |        | HOMO-5 $\rightarrow$ LUMO(+9%) HOMO-8 $\rightarrow$ LUMO(6%)        |
| 323.6                | 3.83  | 0.065  | HOMO-2 $\rightarrow$ LUMO+3(+46%) HOMO-5 $\rightarrow$ LUMO+2(+19%) |
| 320.9                | 3.86  | 0.0684 | HOMO-5 $\rightarrow$ LUMO+2(+33%) HOMO-2 $\rightarrow$ LUMO+3(23%)  |
|                      |       |        | HOMO-6 $\rightarrow$ LUMO(+10%) HOMO-1 $\rightarrow$ LUMO+5(+8%)    |
|                      |       |        | HOMO-7 $\rightarrow$ LUMO+2(+7%)                                    |
| 318.5                | 3.89  | 0.1906 | HOMO-7 $\rightarrow$ LUMO(+55%) HOMO-6 $\rightarrow$ LUMO(+27%)     |
|                      |       |        | HOMO-2 $\rightarrow$ LUMO+3(+5%)                                    |
| 317.3                | 3.91  | 0.1933 | HOMO-8 $\rightarrow$ LUMO(+71%) HOMO-6 $\rightarrow$ LUMO(+6%)      |
| 310.9                | 3.99  | 0.0642 | HOMO-2 $\rightarrow$ LUMO+4(+19%) HOMO-1 $\rightarrow$ LUMO+5(16%)  |
|                      |       |        | HOMO-8 $\rightarrow$ LUMO+2(9%) HOMO-1 $\rightarrow$ LUMO+4(+9%)    |
|                      |       |        | HOMO-6 $\rightarrow$ LUMO+1(+8%) HOMO-2 $\rightarrow$ LUMO+3(7%)    |
|                      |       |        | HOMO-7 $\rightarrow$ LUMO+2(5%)                                     |
| 308.9                | 4.01  | 0.1788 | HOMO-6 $\rightarrow$ LUMO+2(+31%) HOMO-1 $\rightarrow$ LUMO+5(+30%) |
|                      |       |        | HOMO-6 $\rightarrow$ LUMO+1(12%) HOMO-8 $\rightarrow$ LUMO+2(8%)    |
|                      |       |        | HOMO-3 $\rightarrow$ L+2(+6%)                                       |
| 306.7                | 4.04  | 0.0637 | HOMO-1 $\rightarrow$ LUMO+4(+40%) HOMO-5 $\rightarrow$ LUMO+3(11%)  |
|                      |       |        | HOMO-6 $\rightarrow$ LUMO+1(9%) HOMO-5 $\rightarrow$ LUMO+2(8%)     |
| 299.9                | 4.13  | 0.1941 | HOMO-5 $\rightarrow$ LUMO+3(+28%) HOMO-2 $\rightarrow$ LUMO+5(19%)  |
|                      |       |        | HOMO-6 $\rightarrow$ LUMO+1(15%) HOMO-2 $\rightarrow$ LUMO+4(+11%)  |
|                      |       |        | HOMO-3 $\rightarrow$ LUMO+5(+8%)                                    |
| 298.1                | 4.16  | 0.1276 | HOMO-7 $\rightarrow$ LUMO+1(+24%) HOMO-2 $\rightarrow$ LUMO+5(19%)  |
|                      |       |        | HOMO-8 $\rightarrow$ LUMO+1(+12%) HOMO-6 $\rightarrow$ LUMO+1(+10%) |

<sup>a</sup>Except for S1 transitions, only calculated excitation with  $f \geq 0.06$  are listed.

## 9. DSC data of all complexes.

| <b>Table S5.</b> DSC data of all complexes.                                                                                                                                                       |                       |          |                                           |
|---------------------------------------------------------------------------------------------------------------------------------------------------------------------------------------------------|-----------------------|----------|-------------------------------------------|
| Com                                                                                                                                                                                               | Heating process       |          |                                           |
|                                                                                                                                                                                                   | Transition            | Tem (°C) | $\Delta H(\text{KJ}\cdot\text{mol}^{-1})$ |
| Ir-A3                                                                                                                                                                                             | g-Iso                 | 182      | —                                         |
| Ir-B                                                                                                                                                                                              | g-Iso                 | 29       | —                                         |
| Ir-B1                                                                                                                                                                                             | g-Iso                 | 21       | —                                         |
| Ir-B3                                                                                                                                                                                             | Cr-Iso                | 121      | 4.55                                      |
| Ir-C                                                                                                                                                                                              | Cr-Iso                | -32      | 25.57                                     |
| Ir-C1                                                                                                                                                                                             | Cr-Col <sub>h</sub>   | -21      | 27.15                                     |
|                                                                                                                                                                                                   | Col <sub>h</sub> -Iso | 121      | 5.93                                      |
| Ir-C3                                                                                                                                                                                             | Cr-Col <sub>h</sub>   | -9       | 52.24                                     |
|                                                                                                                                                                                                   | Col <sub>h</sub> -Iso | 97       | 5.77                                      |
| Com = compounds; Tem = temperature; g = glass state; Iso = isotropic liquid; Cr = crystal phase. Data from the second heating process of DSC ( <b>Figure S6</b> and <b>Figure 7</b> , 10 °C/min). |                       |          |                                           |
